# Supplementary material for: (−)-Tarchonanthuslactone Exerts a Blood Glucose-Increasing Effect in Experimental Type 2 Diabetes Mellitus
Source: MDPI journal article supplement (doi:10.3390/molecules20035038), 2015-03-19
Supplement: s1 [file s1]

## Supplementary Materials

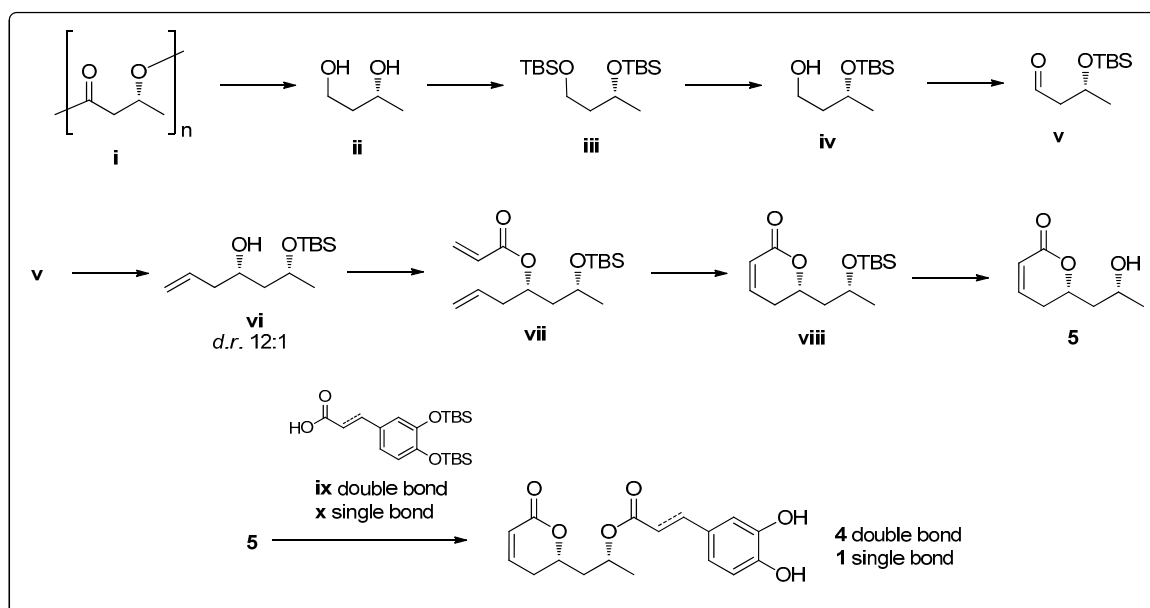

**Scheme S1.** Synthesis of tarchonanthuslactone **1** and analogue **4**.

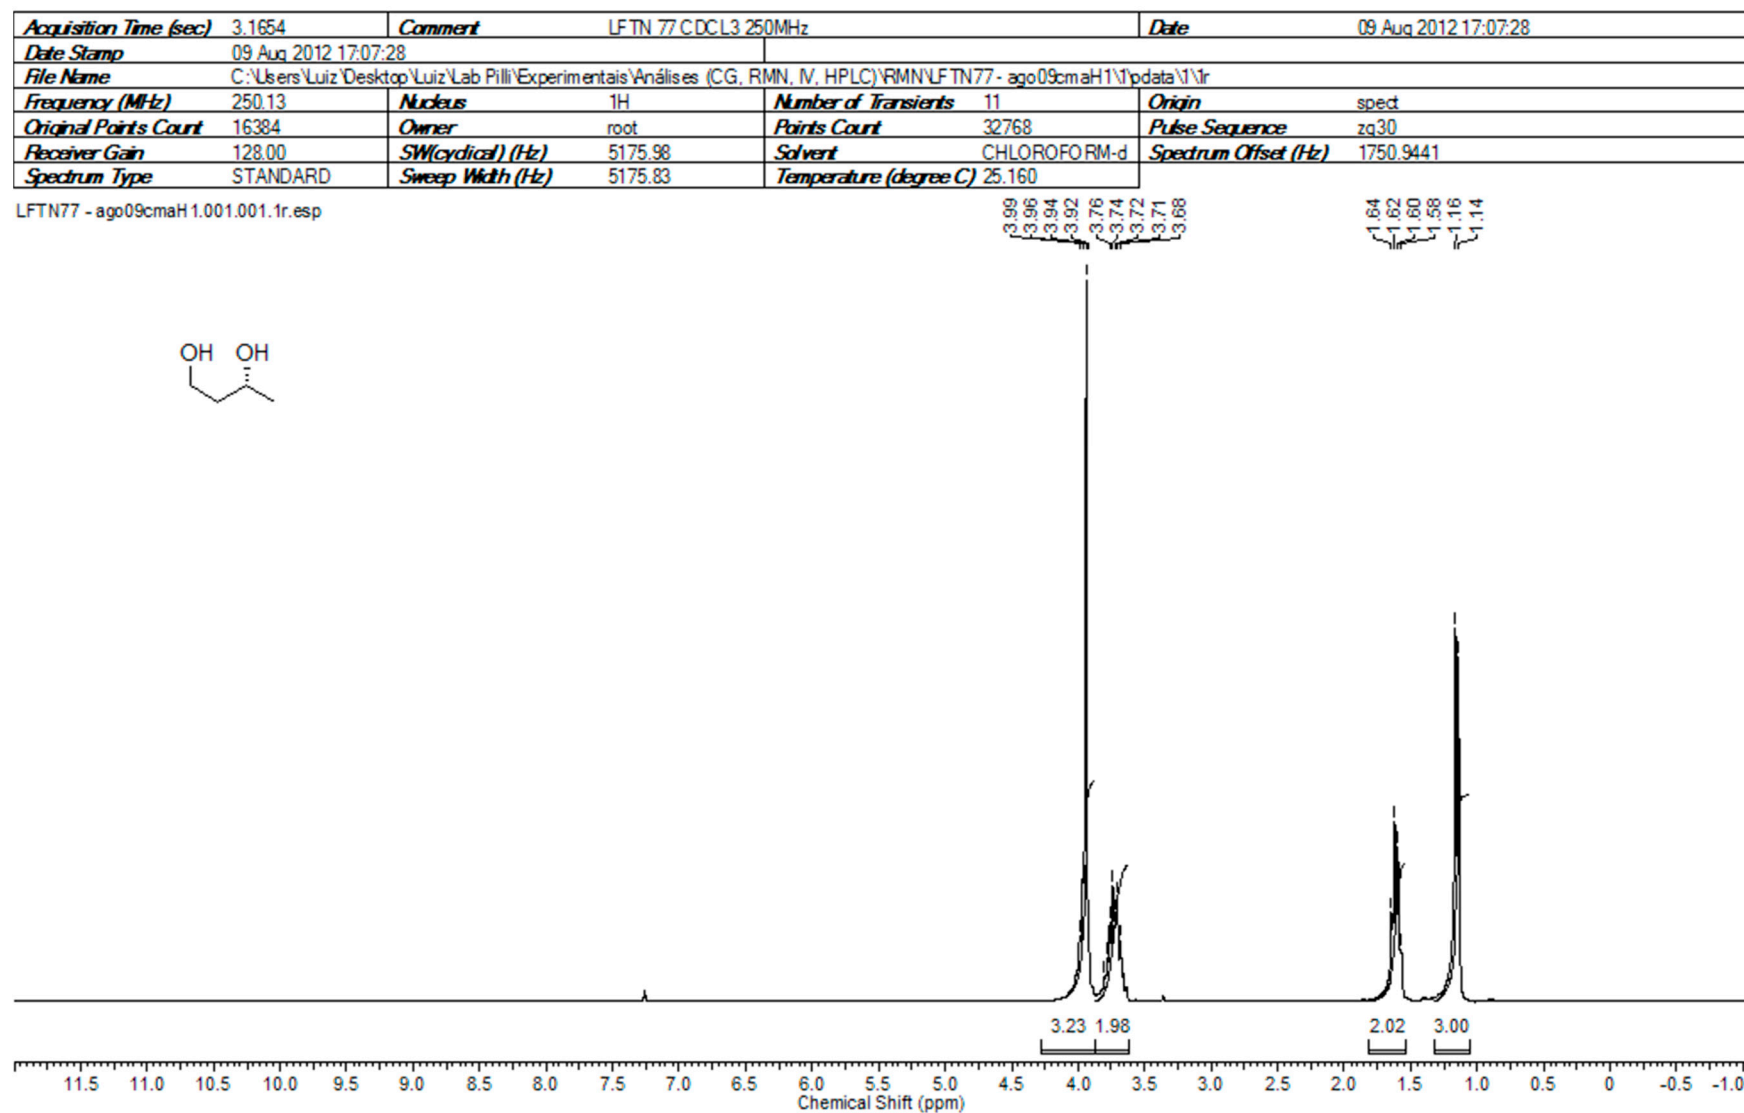

Figure S1. <sup>1</sup>H-NMR (250 MHz, CDCl<sub>3</sub>) of compound ii.

|                        |                                                                                                                     |                   |                      |                        |              |                      |                      |
|------------------------|---------------------------------------------------------------------------------------------------------------------|-------------------|----------------------|------------------------|--------------|----------------------|----------------------|
| Acquisition Time (sec) | 0.5439                                                                                                              | Comment           | LFTN 77 CDCL3 250MHz |                        |              | Date                 | 09 Aug 2012 17:26:40 |
| Date Stamp             | 09 Aug 2012 17:26:40                                                                                                |                   |                      |                        |              |                      |                      |
| File Name              | C:\Users\Luiz\Desktop\Luiz\Lab Pilli\Experimentais\Análises (CG, RMN, IV, HPLC)\RMN\LFTN77 - ago09cm aC\1\data\1\1r |                   |                      |                        |              |                      |                      |
| Frequency (MHz)        | 62.90                                                                                                               | Nucleus           | <sup>13</sup> C      | Number of Transients   | 386          | Origin               | spec                 |
| Original Points Count  | 8192                                                                                                                | Owner             | root                 | Points Count           | 32768        | Pulse Sequence       | zgpg30               |
| Receiver Gain          | 362.00                                                                                                              | SW(cyclical) (Hz) | 15060.24             | Solvent                | CHLOROFORM-d | Spectrum Offset (Hz) | 6295.4580            |
| Spectrum Type          | STANDARD                                                                                                            | Sweep Width (Hz)  | 15059.78             | Temperature (degree C) | 25.160       |                      |                      |
|                        |                                                                                                                     |                   |                      |                        |              |                      |                      |

LFTN77C.esp

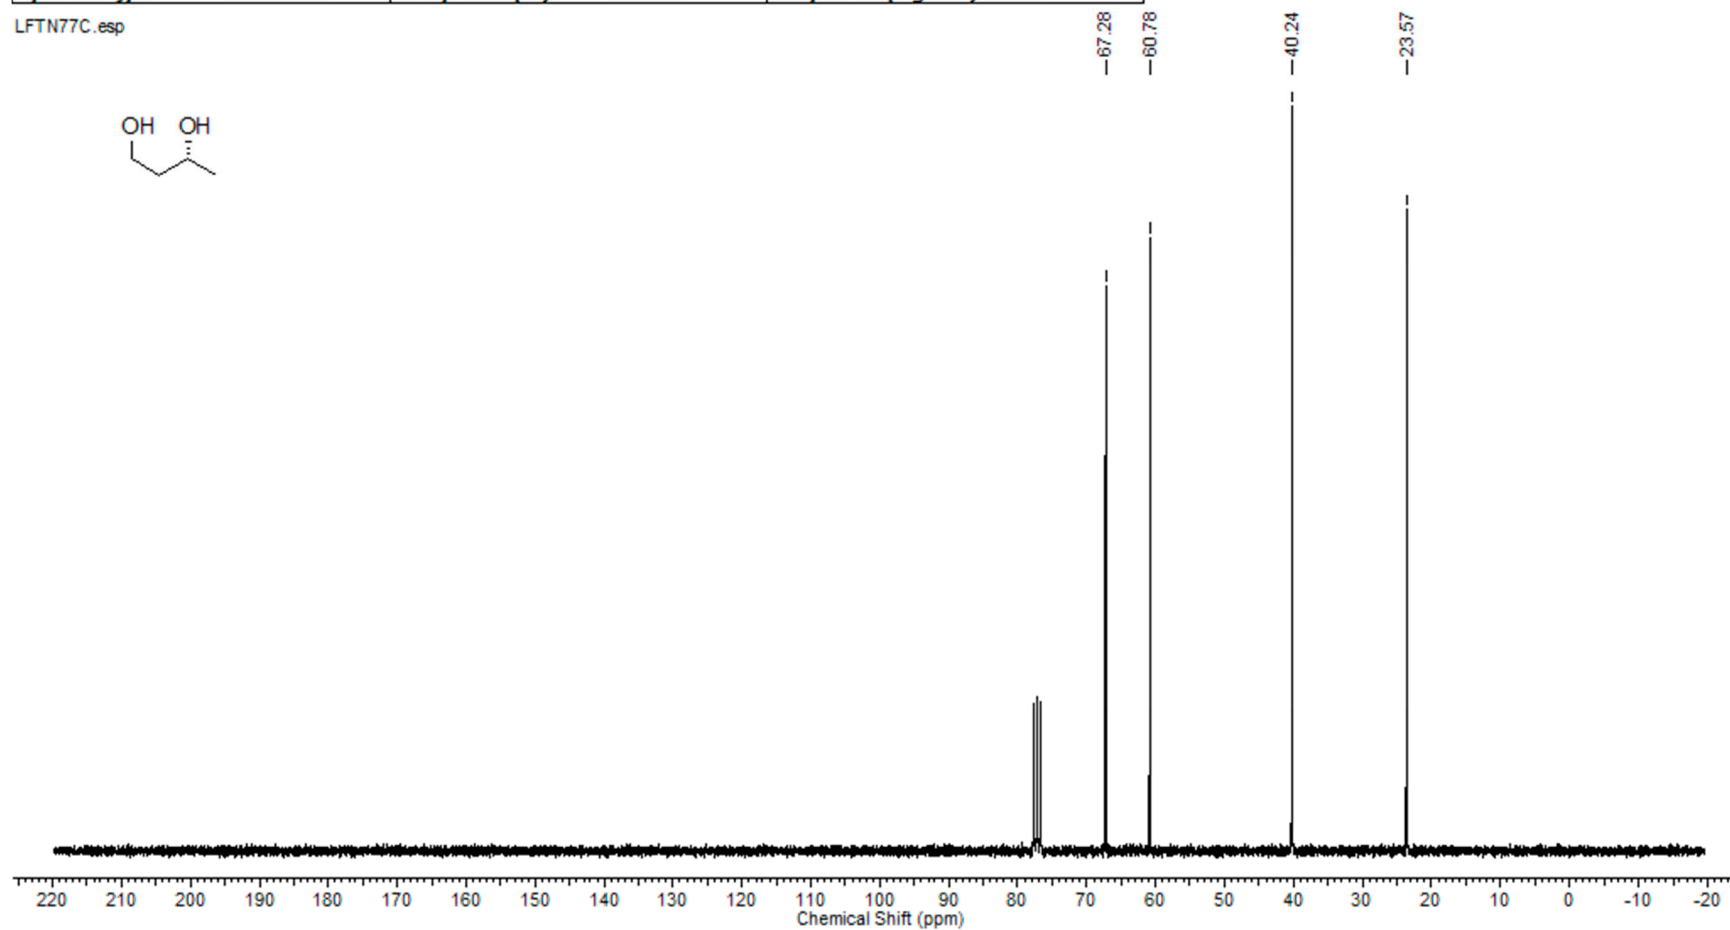Figure S2. <sup>13</sup>C-NMR (62.9 MHz, CDCl<sub>3</sub>) of compound ii.

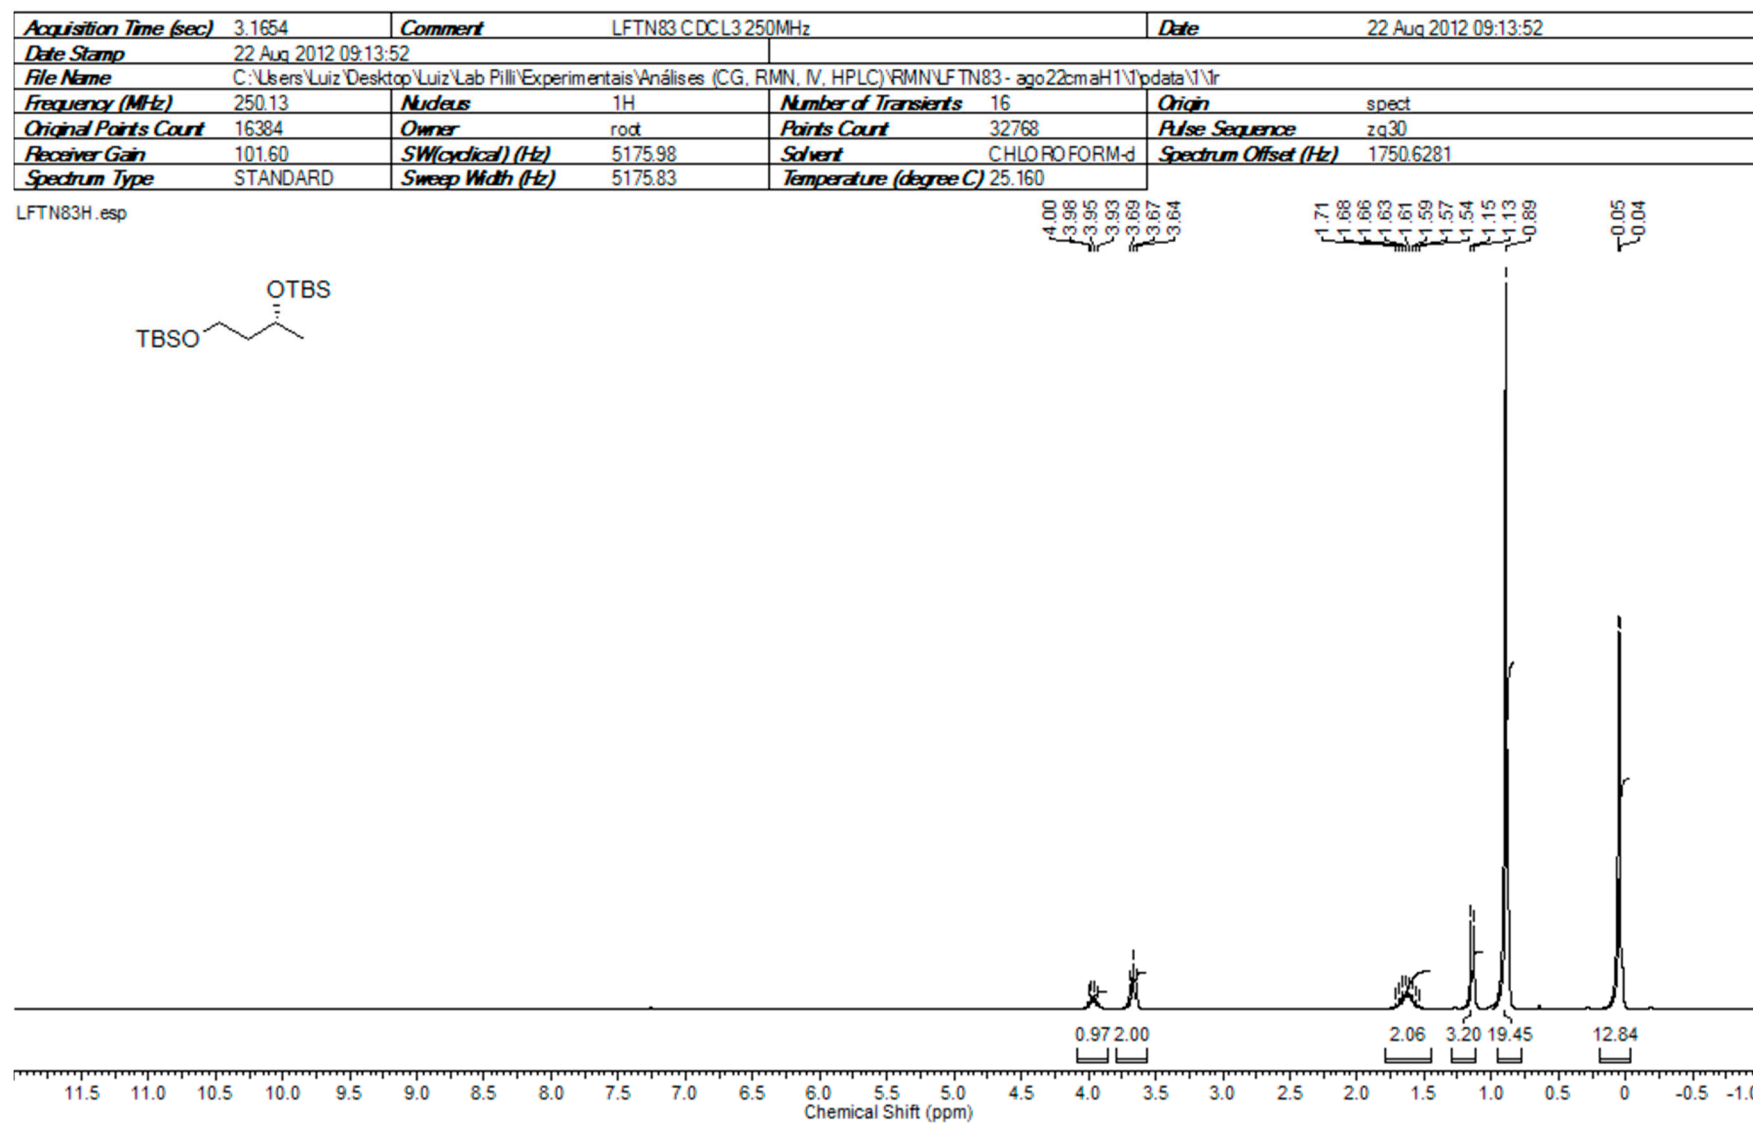

Figure S3. <sup>1</sup>H-NMR (250 MHz, CDCl<sub>3</sub>) of compound **iii**.

|                        |                                                                                                                    |                  |                         |                        |                      |
|------------------------|--------------------------------------------------------------------------------------------------------------------|------------------|-------------------------|------------------------|----------------------|
| Acquisition Time (sec) | 0.5439                                                                                                             | Comment          | LFTN83.CDCL3 250MHz C13 | Date                   | 22 Aug 2012 10:07:12 |
| Date Stamp             | 22 Aug 2012 10:07:12                                                                                               |                  |                         |                        |                      |
| File Name              | C:\Users\Luiz\Desktop\Luiz\Lab Pilli\Experimentais\Analises (CG, RMN, IV, HPLC)\RMN\LFTN83 - ago22.cma\2\data\1\1r |                  |                         |                        |                      |
| Frequency (MHz)        | 62.90                                                                                                              | Nucleus          | 13C                     | Number of Transients   | 847                  |
| Original Points Count  | 8192                                                                                                               | Owner            | root                    | Points Count           | 32768                |
| Receiver Gain          | 456.10                                                                                                             | SW (Hz)          | 15060.24                | Solvent                | CHLOROFORM-d         |
| Spectrum Type          | STANDARD                                                                                                           | Sweep Width (Hz) | 15059.78                | Temperature (degree C) | 25.160               |
|                        |                                                                                                                    |                  |                         | Pulse Sequence         | zgpg30               |
|                        |                                                                                                                    |                  |                         | Spectrum Offset (Hz)   | 6303.2710            |

LFTN83C.esp

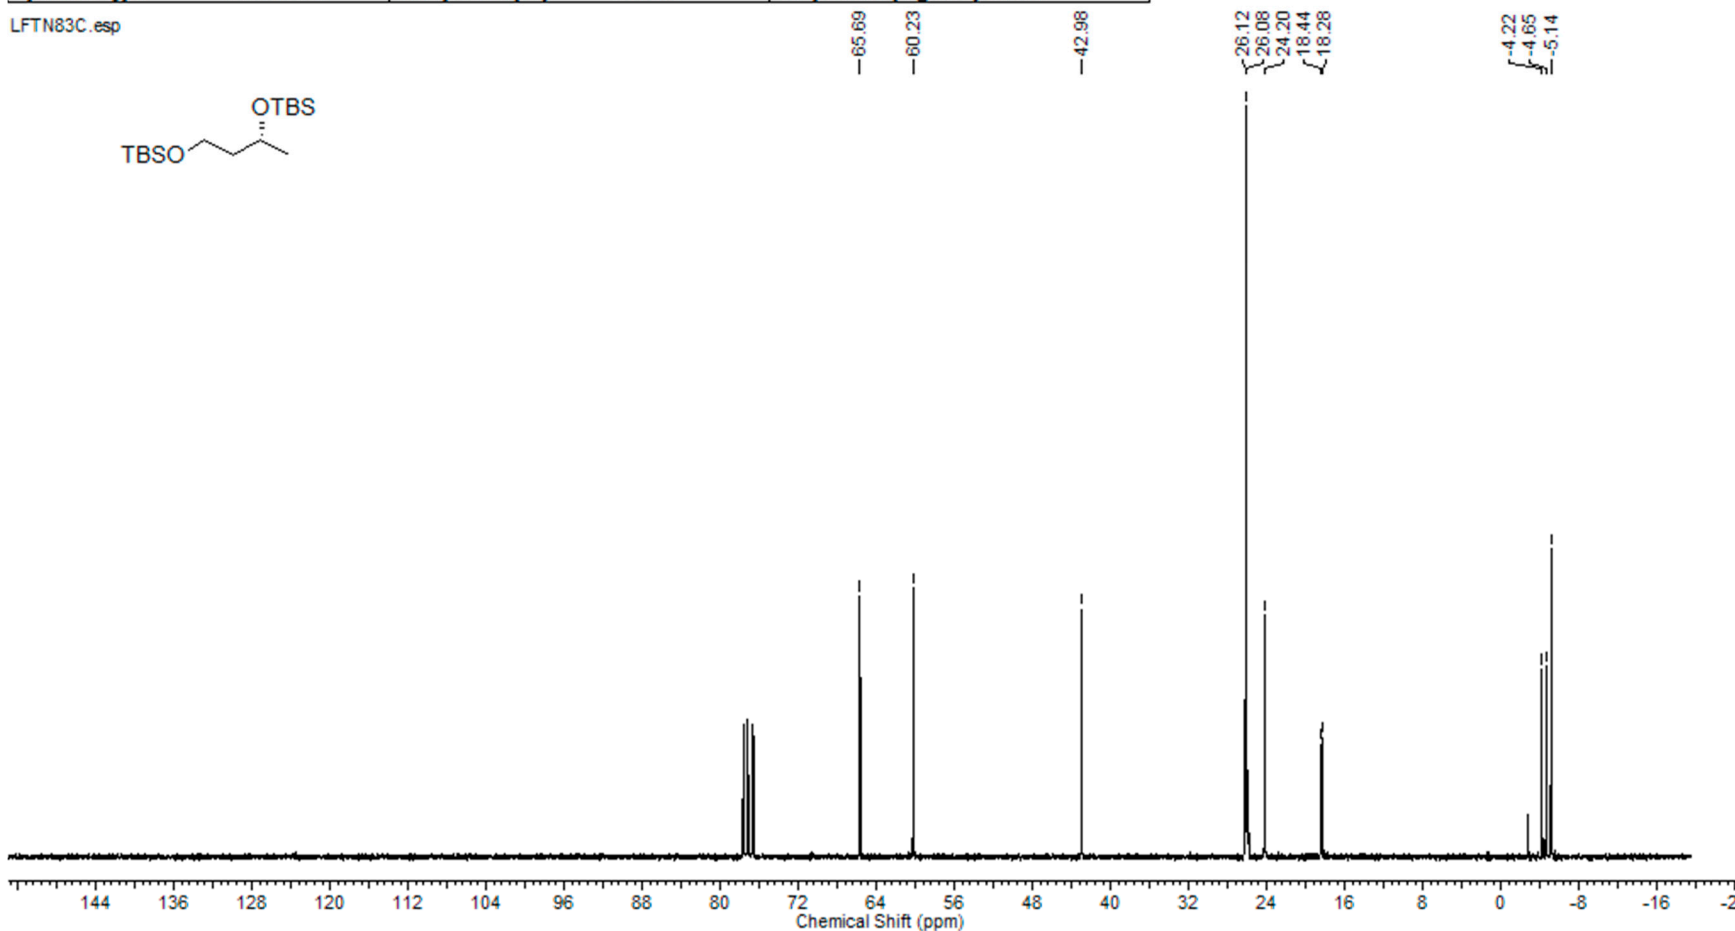

**Figure S4.**  $^{13}\text{C}$ -NMR (62.9 MHz,  $\text{CDCl}_3$ ) of compound **iii**.

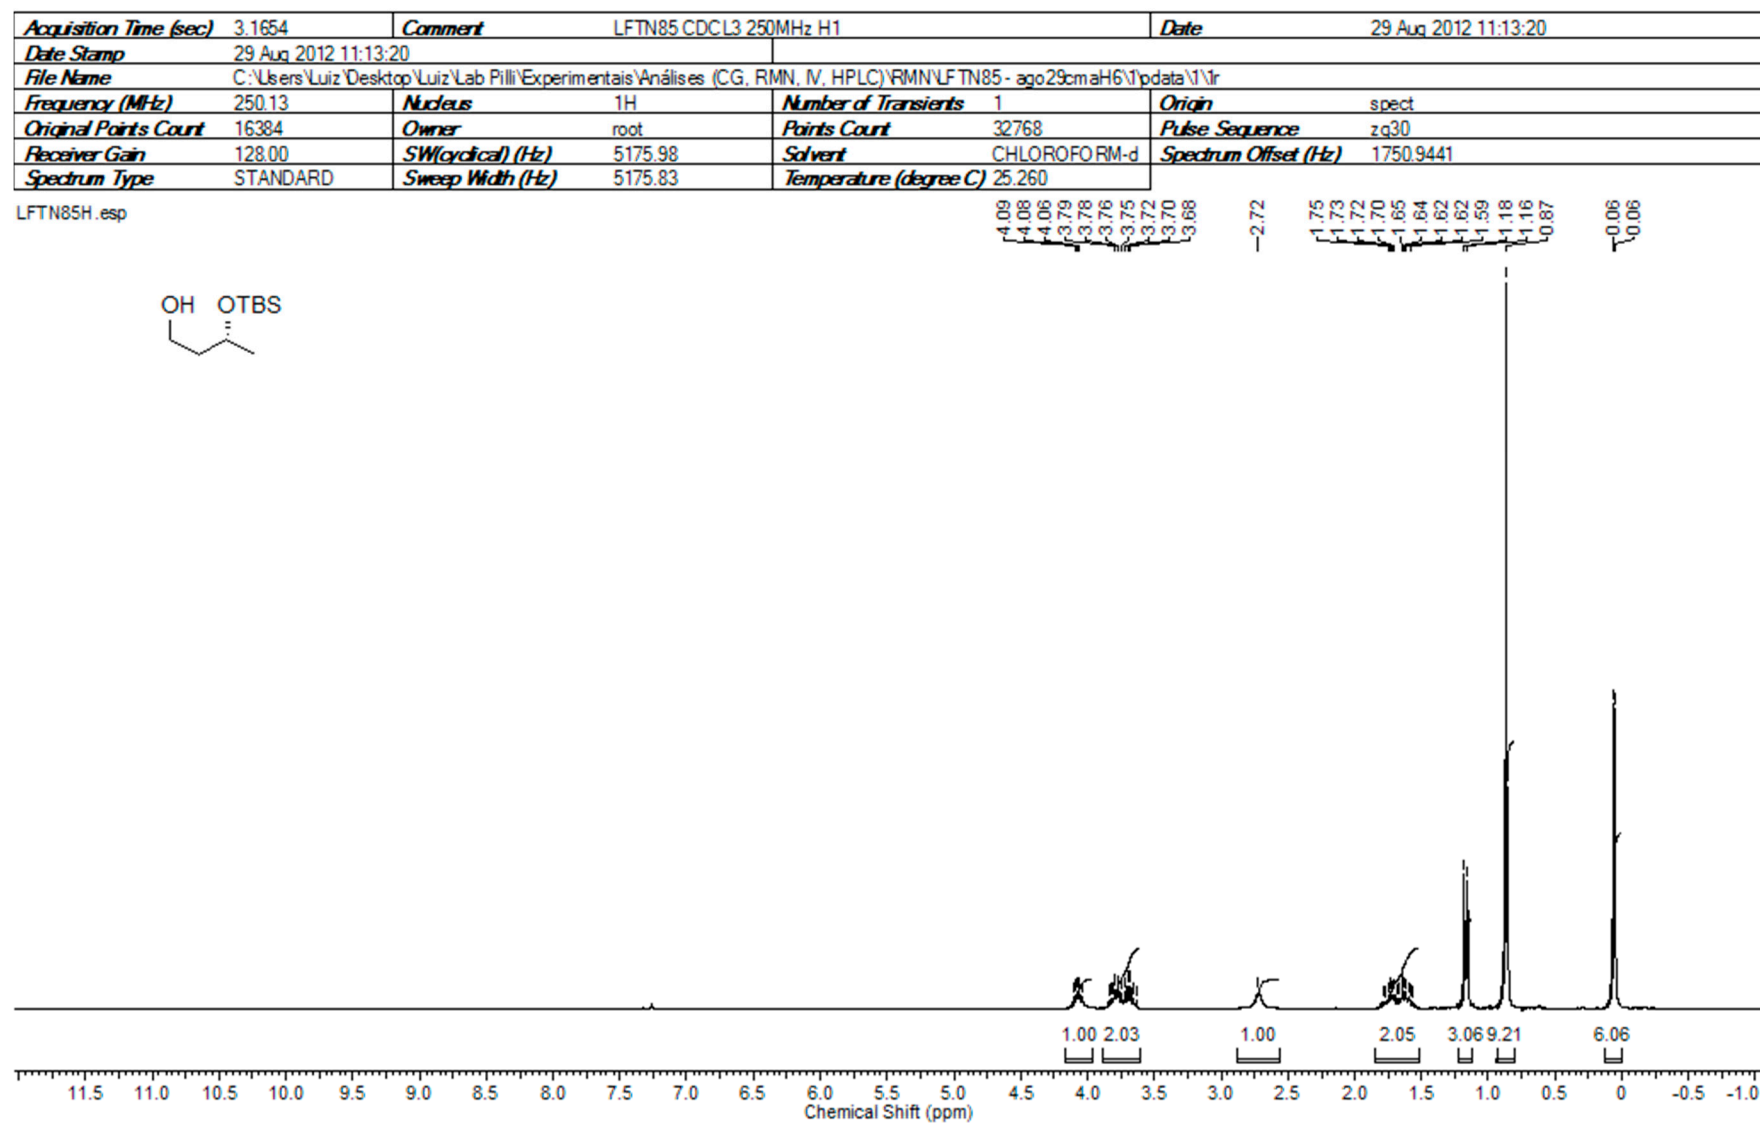

Figure S5. <sup>1</sup>H-NMR (250 MHz, CDCl<sub>3</sub>) of compound **iv**.

|                        |                                                                                                                     |                   |                         |                        |                      |
|------------------------|---------------------------------------------------------------------------------------------------------------------|-------------------|-------------------------|------------------------|----------------------|
| Acquisition Time (sec) | 0.5439                                                                                                              | Comment           | LFTN85 CDCL3 250MHz C13 | Date                   | 29 Aug 2012 11:43:12 |
| Date Stamp             | 29 Aug 2012 11:43:12                                                                                                |                   |                         |                        |                      |
| File Name              | C:\Users\Luiz\Desktop\Luiz\Lab Pilli\Experimentais\Análises (CG, RMN, IV, HPLC)\RMN\LFTN85 - ago29cmah6\3pdata\1\1r |                   |                         |                        |                      |
| Frequency (MHz)        | 62.90                                                                                                               | Nucleus           | 13C                     | Number of Transients   | 538                  |
| Original Points Count  | 8192                                                                                                                | Owner             | root                    | Points Count           | 32768                |
| Receiver Gain          | 512.00                                                                                                              | SW(cyclical) (Hz) | 15060.24                | Solvent                | CHLOROFORM-d         |
| Spectrum Type          | STANDARD                                                                                                            | Sweep Width (Hz)  | 15059.78                | Temperature (degree C) | 25.160               |
|                        |                                                                                                                     |                   |                         | Origin                 | spect                |
|                        |                                                                                                                     |                   |                         | Pulse Sequence         | zgpg30               |
|                        |                                                                                                                     |                   |                         | Spectrum Offset (Hz)   | 6299.1348            |

LFTN85 - ago29cmah6.003.001.1r.esp

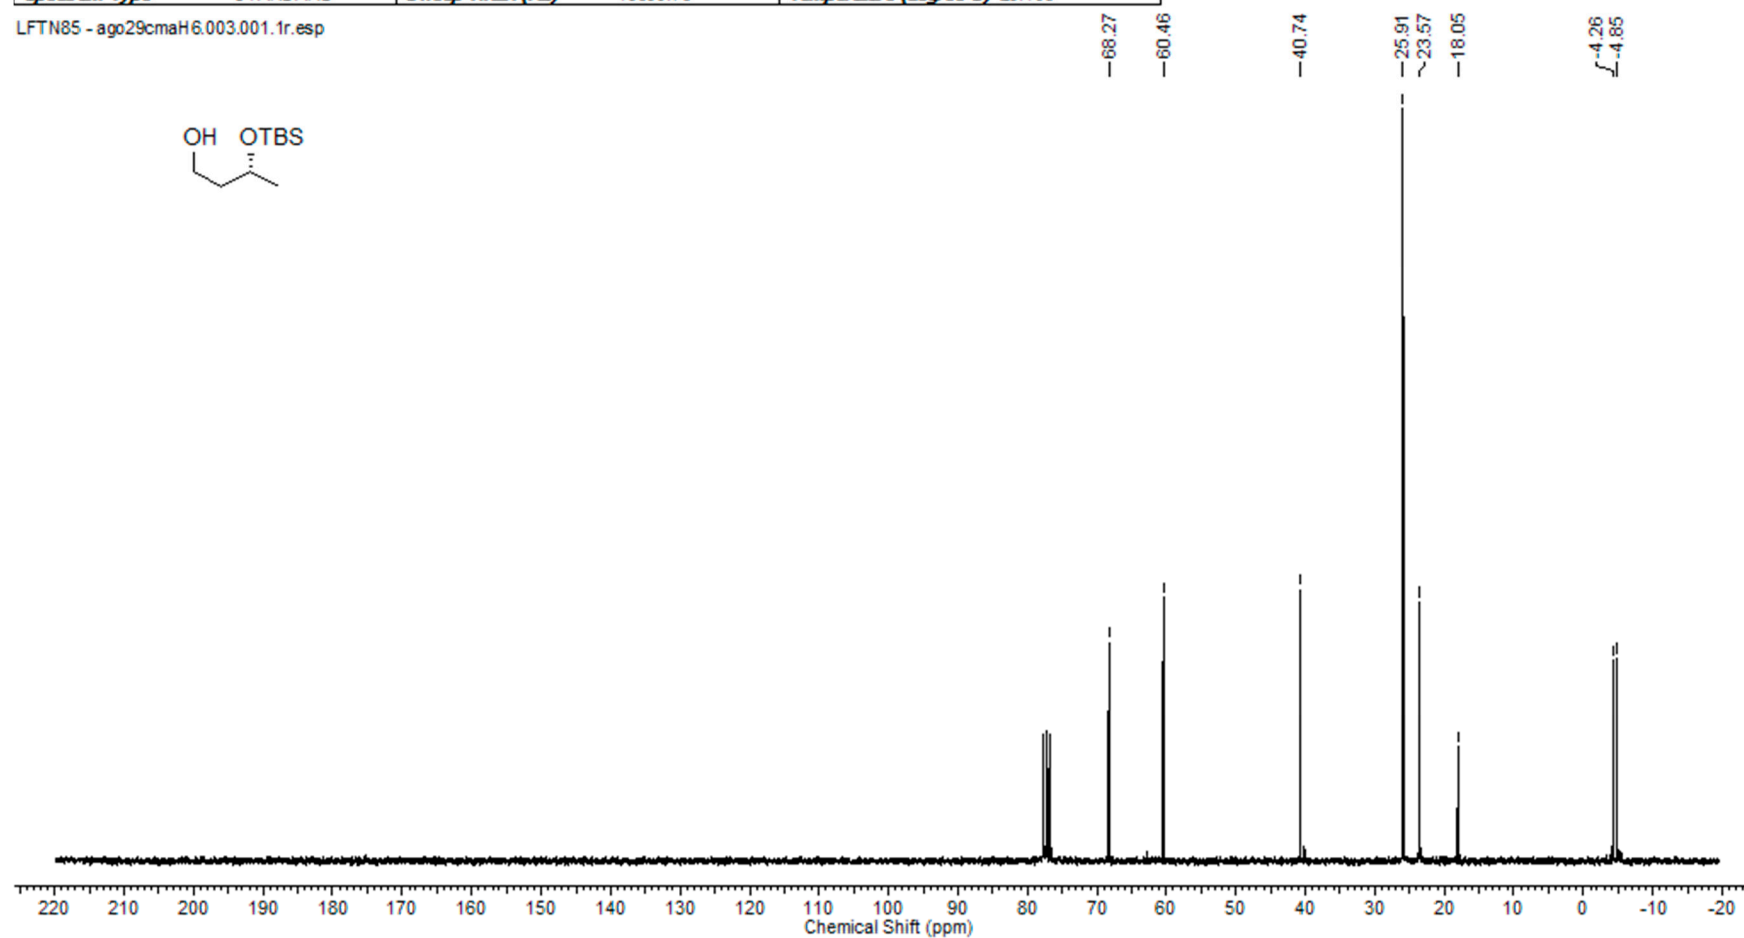Figure S6. <sup>13</sup>C-NMR (62.9 MHz, CDCl<sub>3</sub>) of compound **iv**.

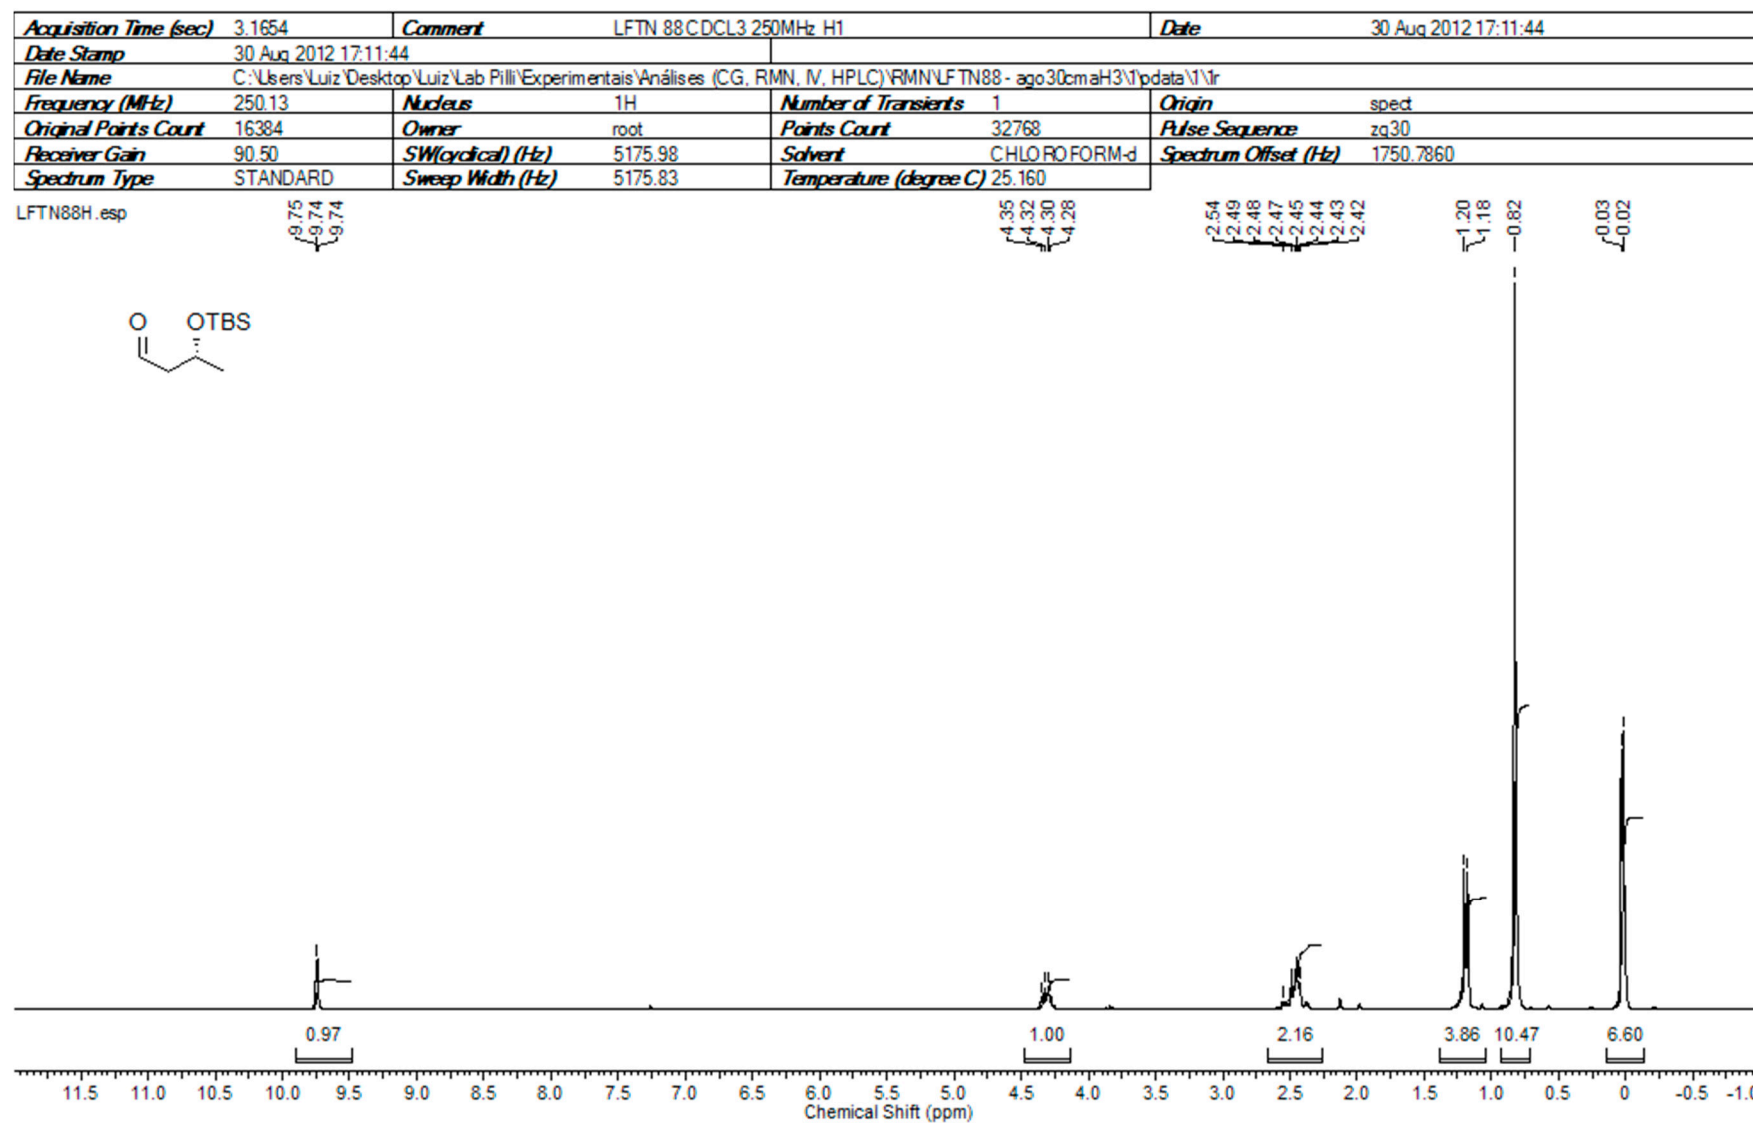

Figure S7. <sup>1</sup>H-NMR (250 MHz, CDCl<sub>3</sub>) of compound v.

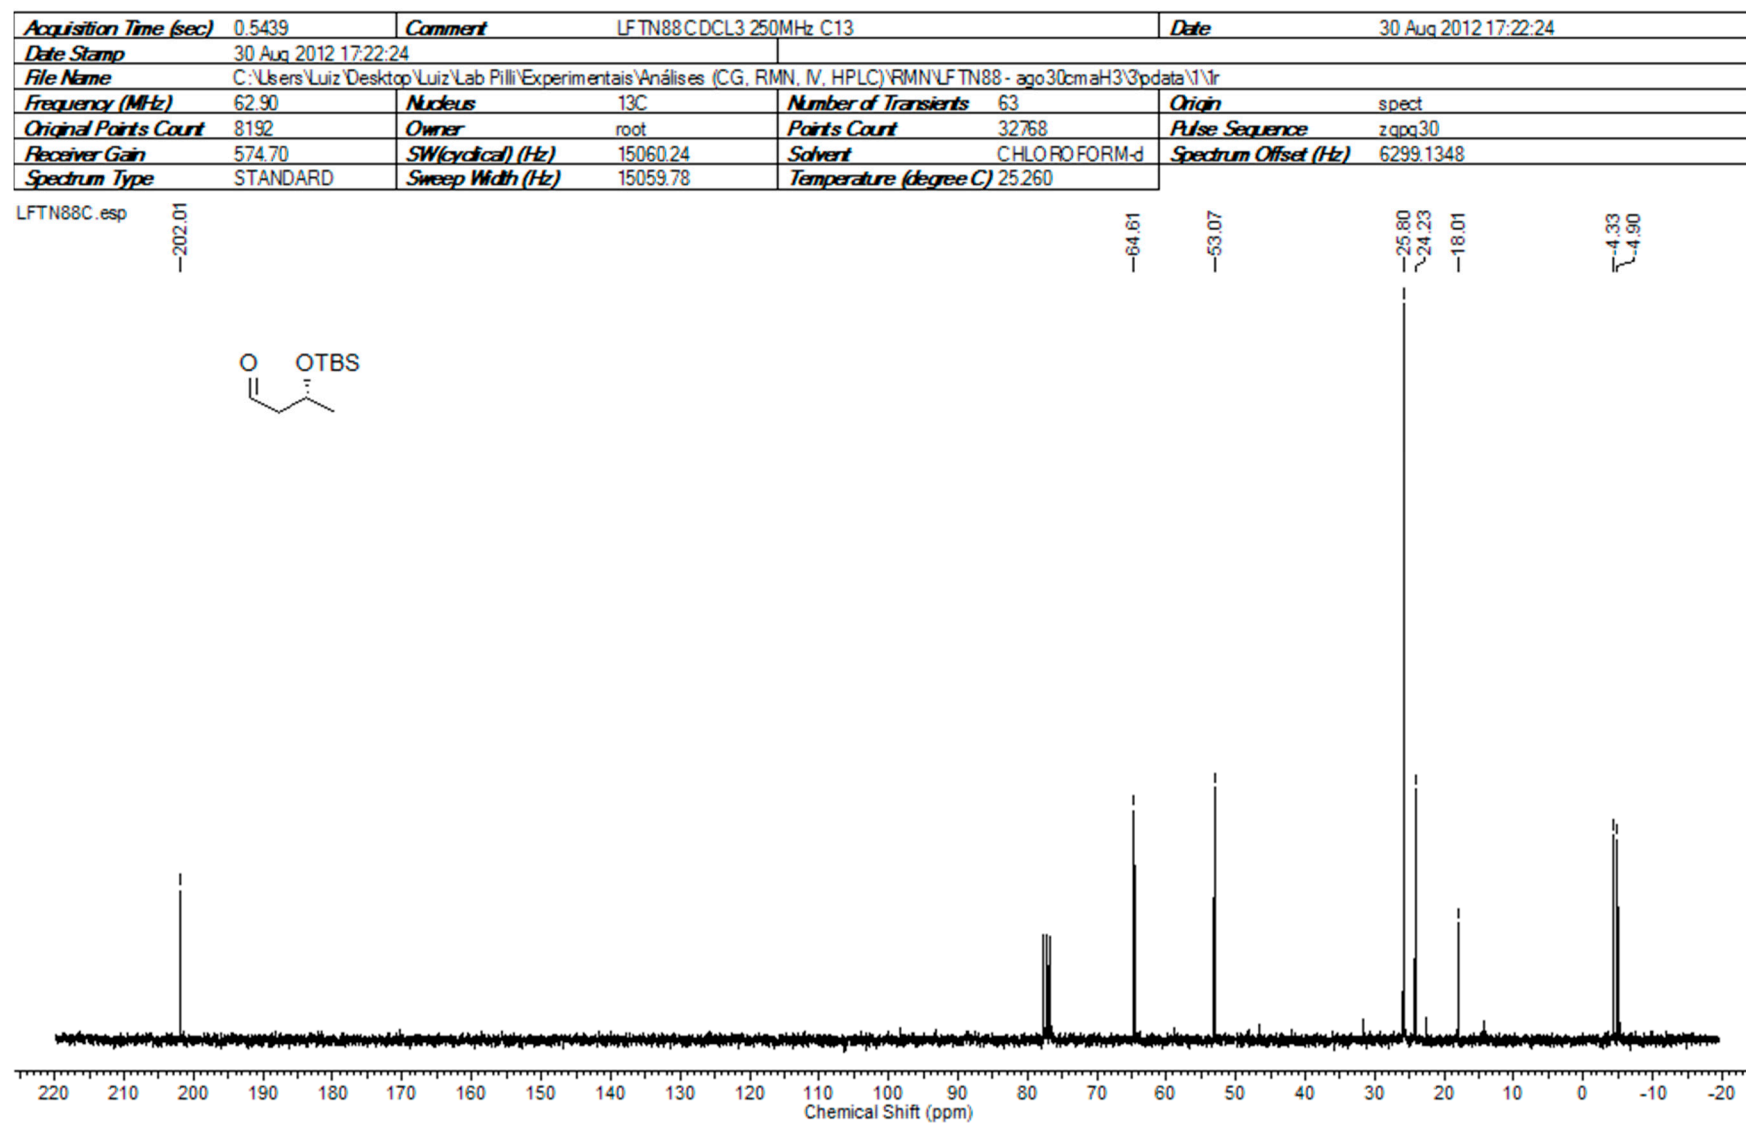

Figure S8. <sup>13</sup>C-NMR (62.9 MHz, CDCl<sub>3</sub>) of compound v.

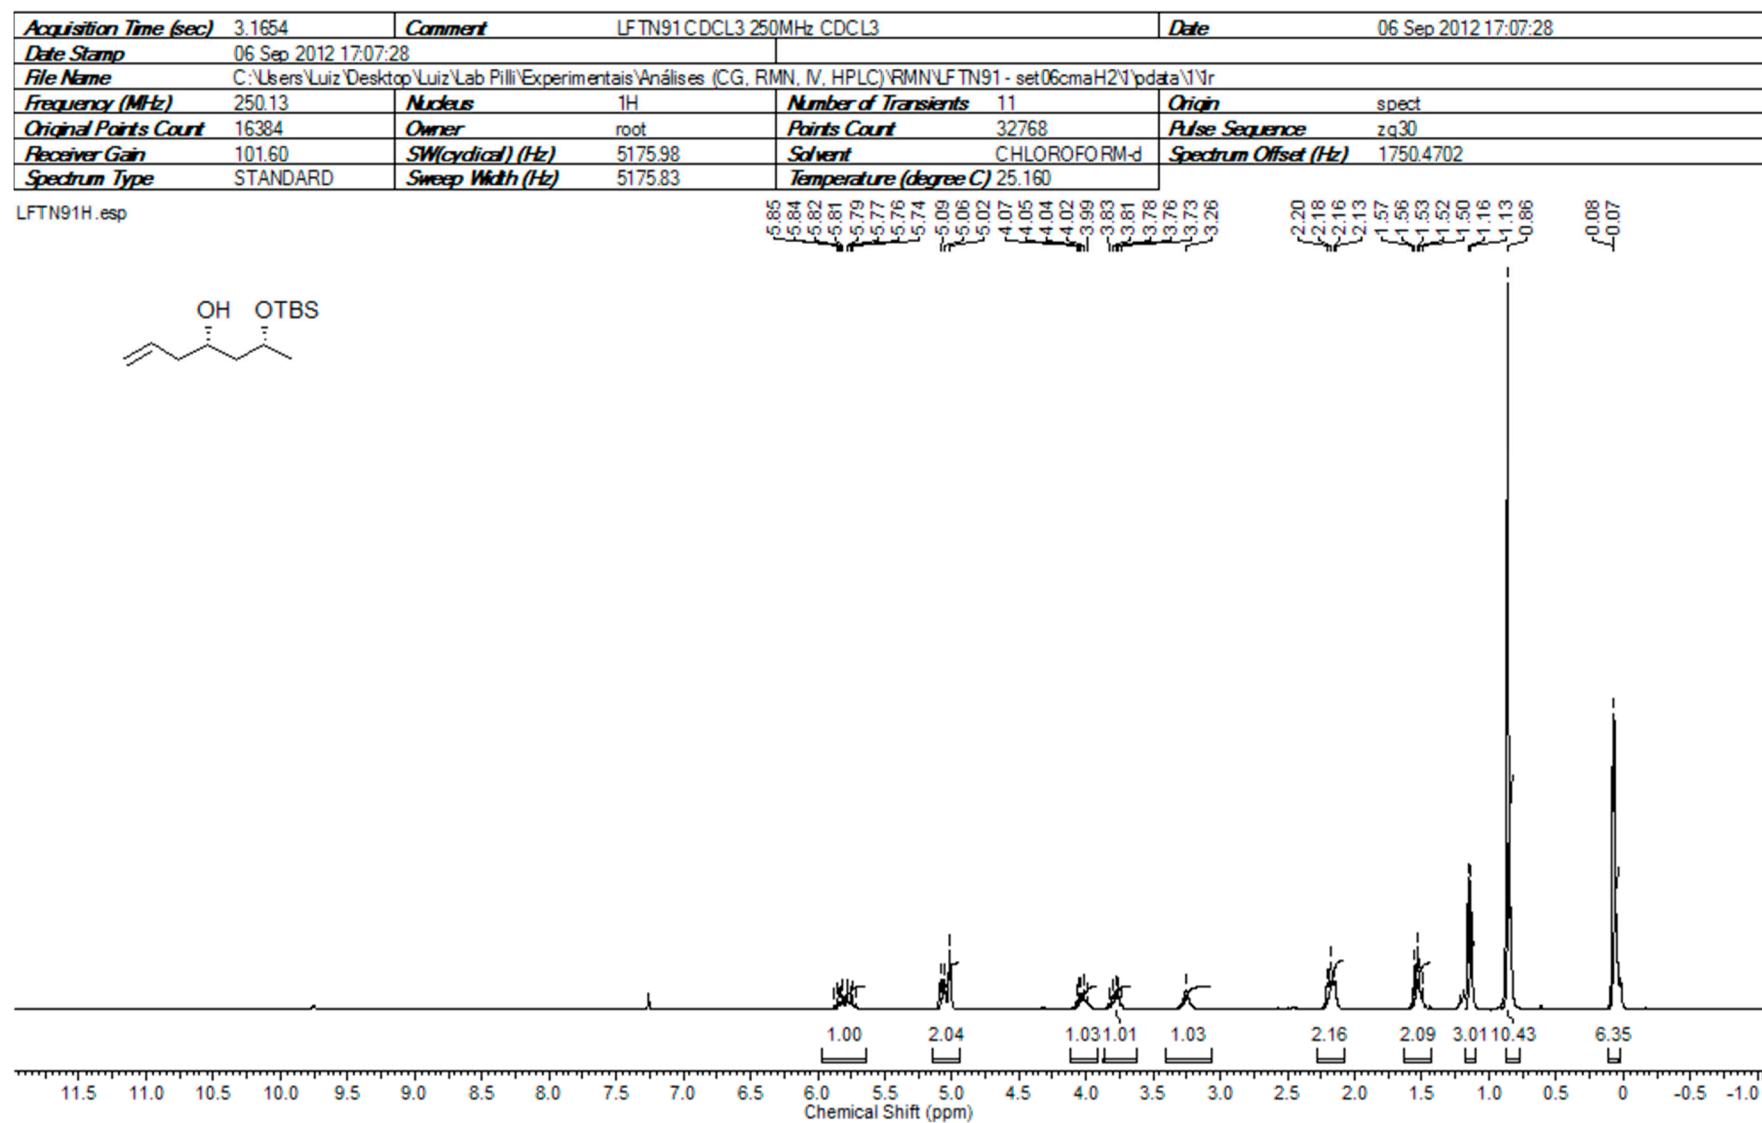

Figure S9. <sup>1</sup>H-NMR (250 MHz, CDCl<sub>3</sub>) of compound vi.

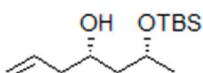

**Figure S10.**  $^{13}\text{C}$ -NMR (62.9 MHz,  $\text{CDCl}_3$ ) of compound **vi**.

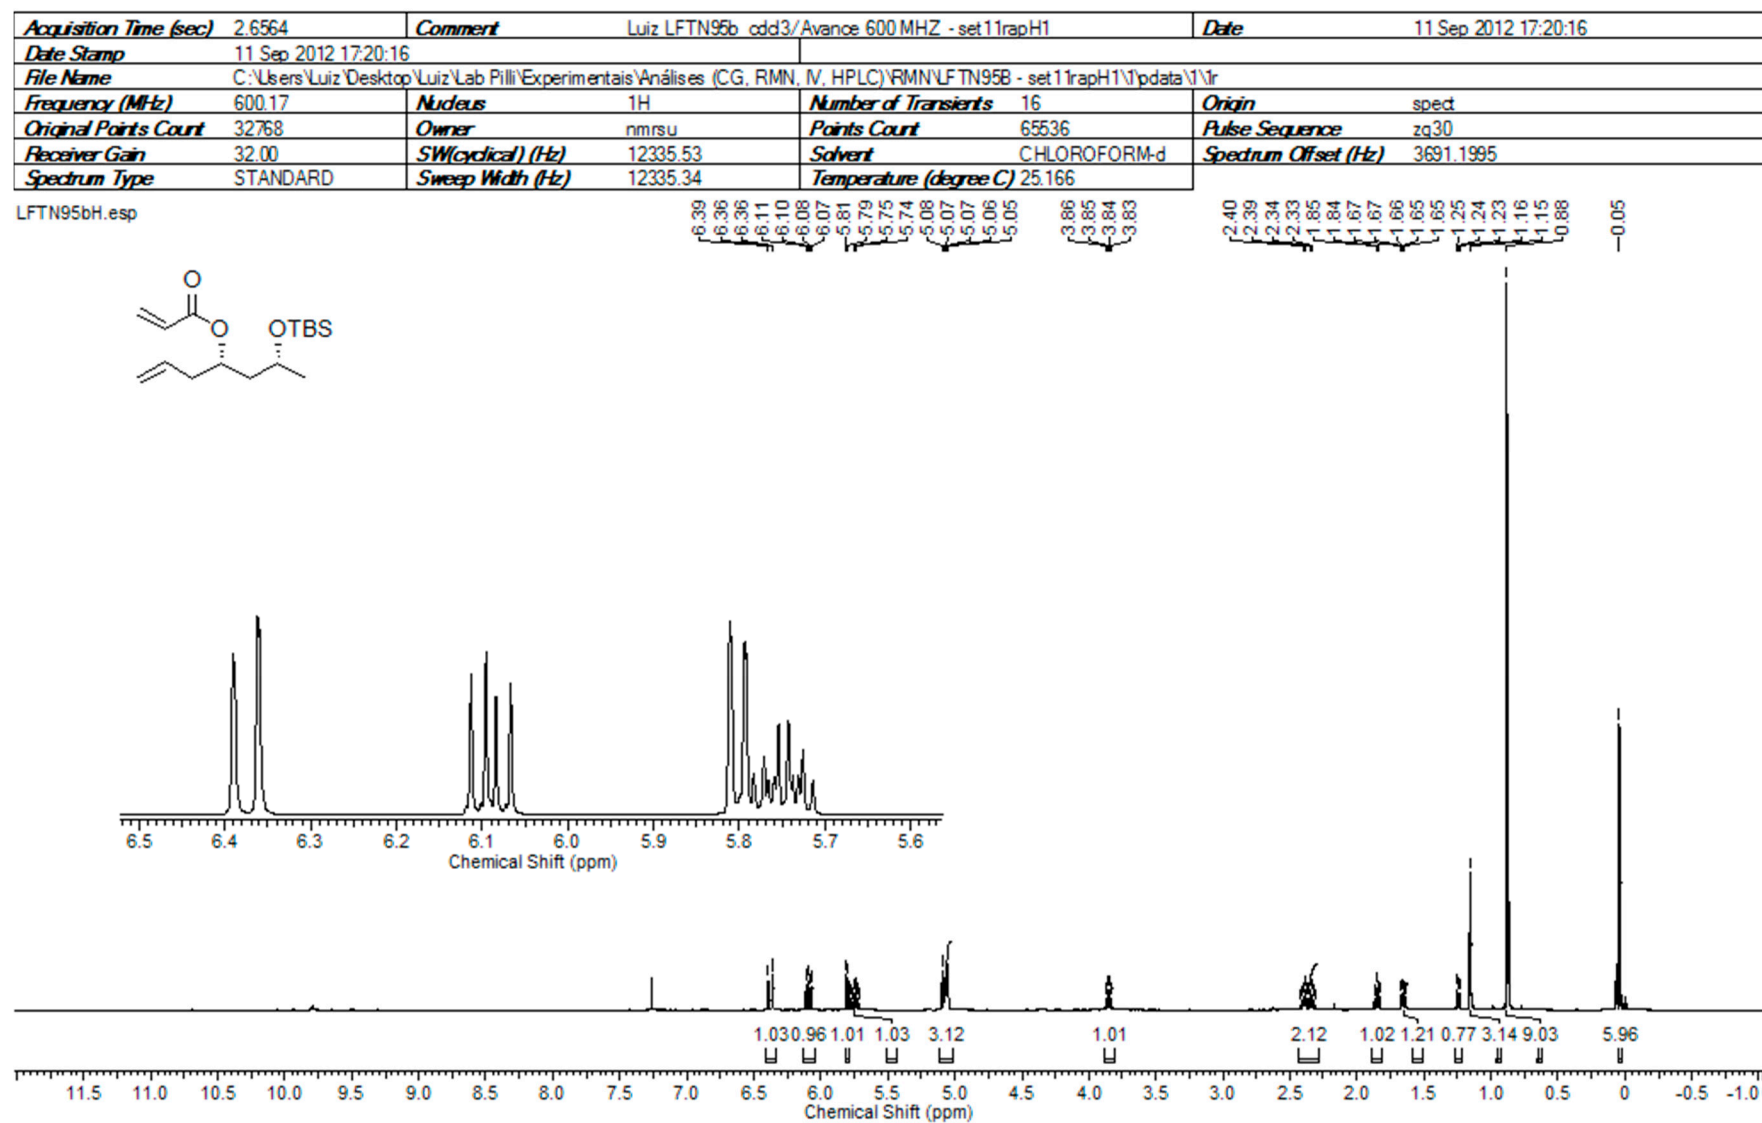Figure S11. <sup>1</sup>H-NMR (600 MHz, CDCl<sub>3</sub>) of compound vii.

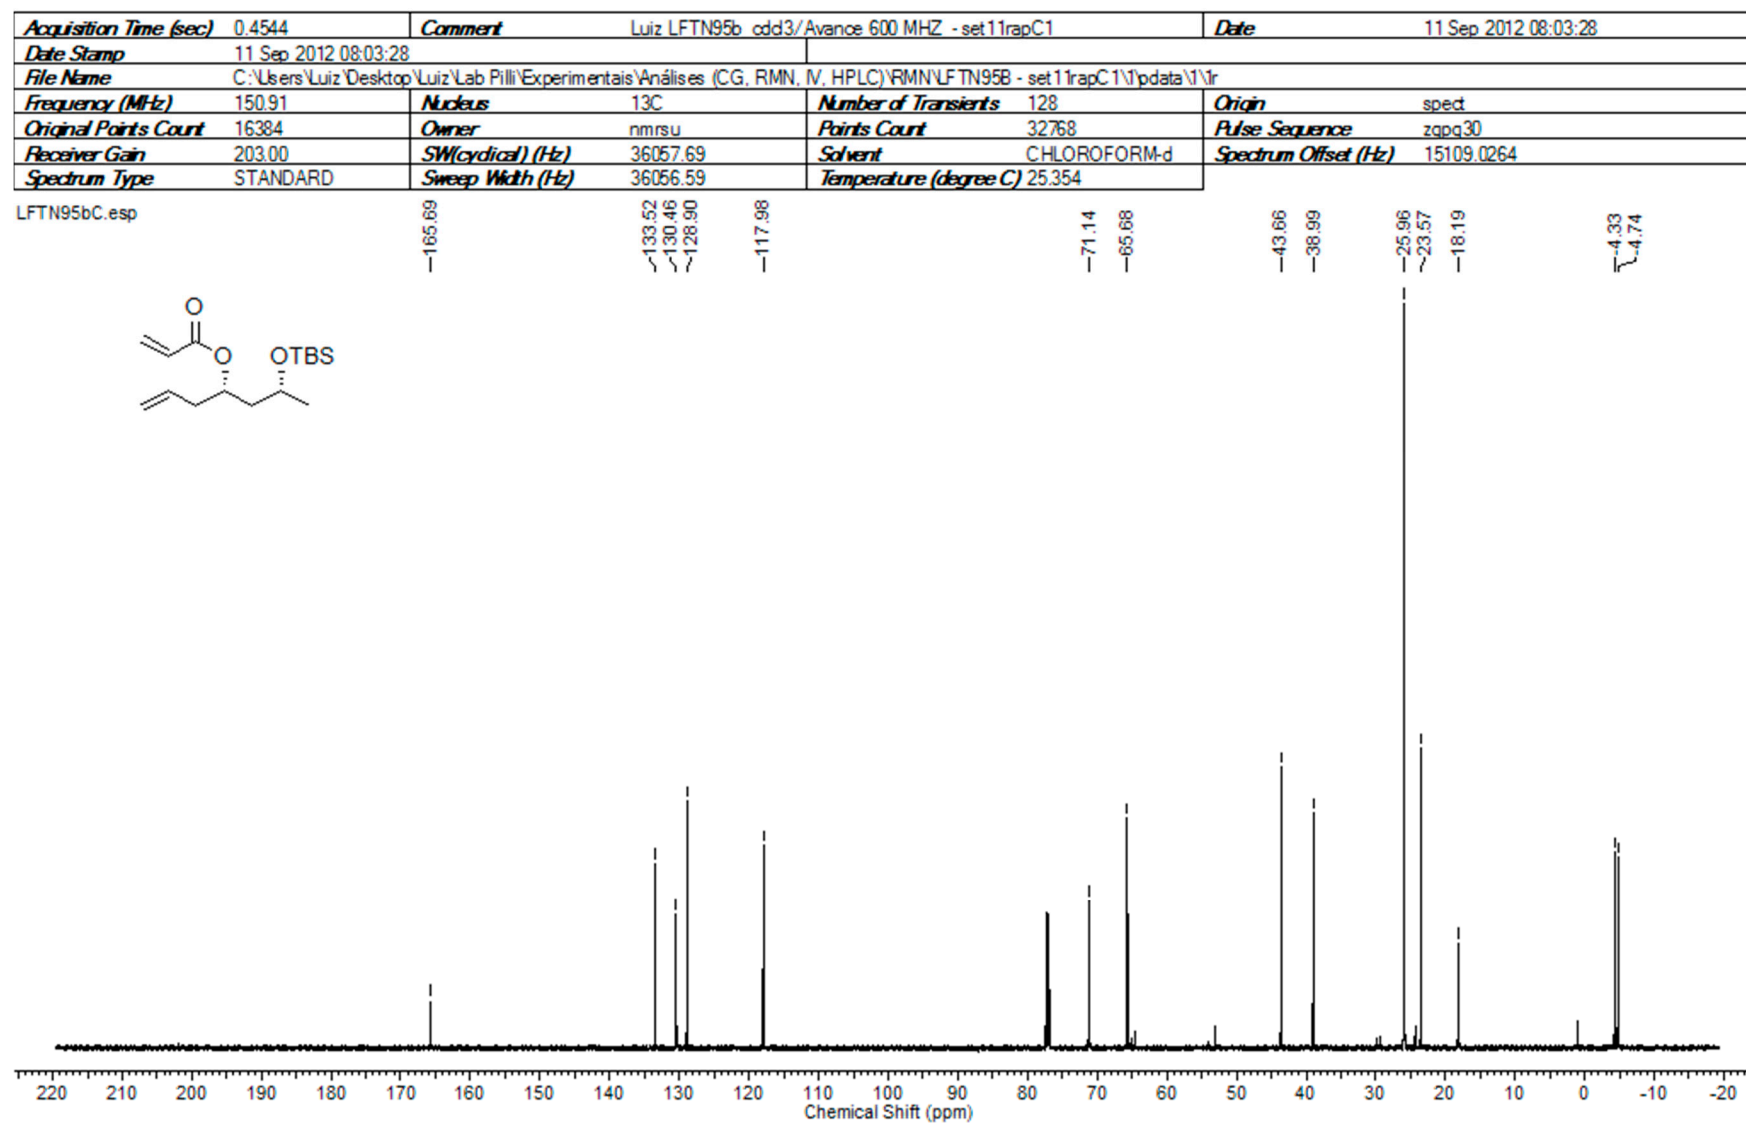

Figure S12. <sup>13</sup>C-NMR (150 MHz, CDCl<sub>3</sub>) of compound vii.

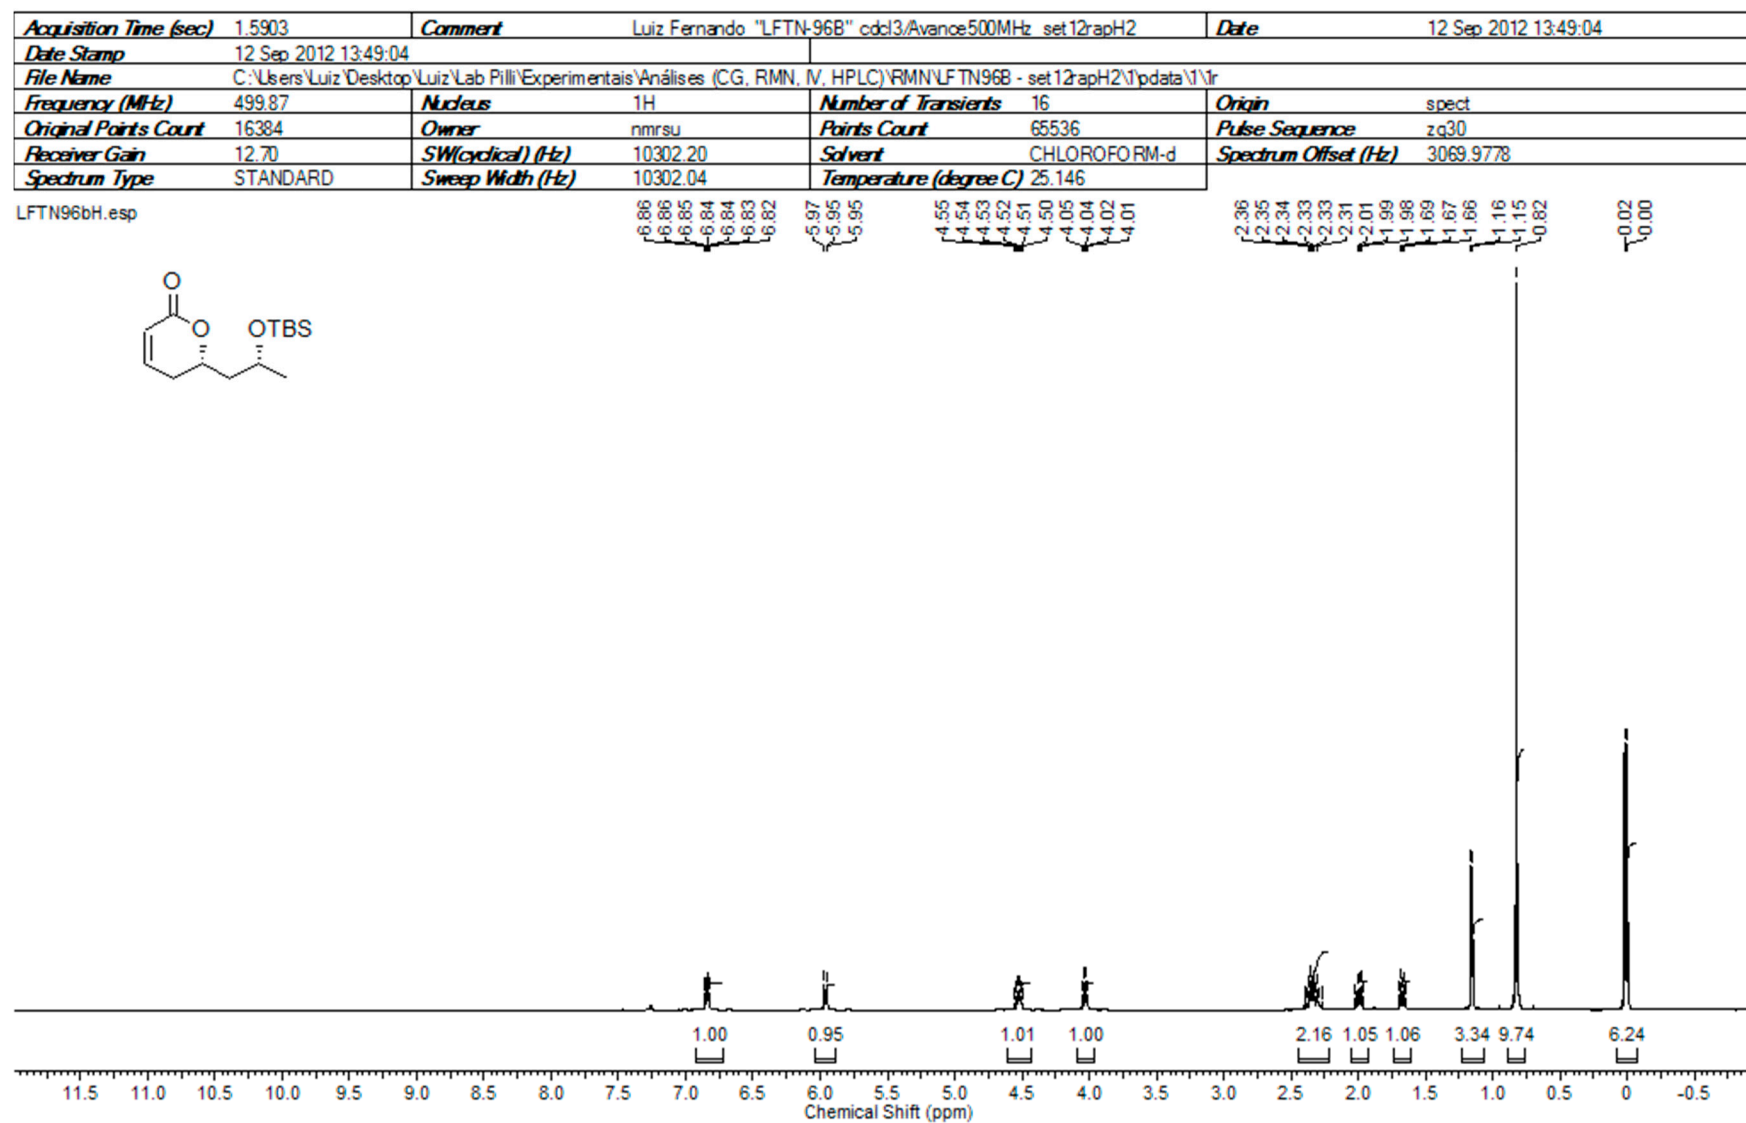

Figure S13.  $^1\text{H}$ -NMR (500 MHz,  $\text{CDCl}_3$ ) of compound viii.

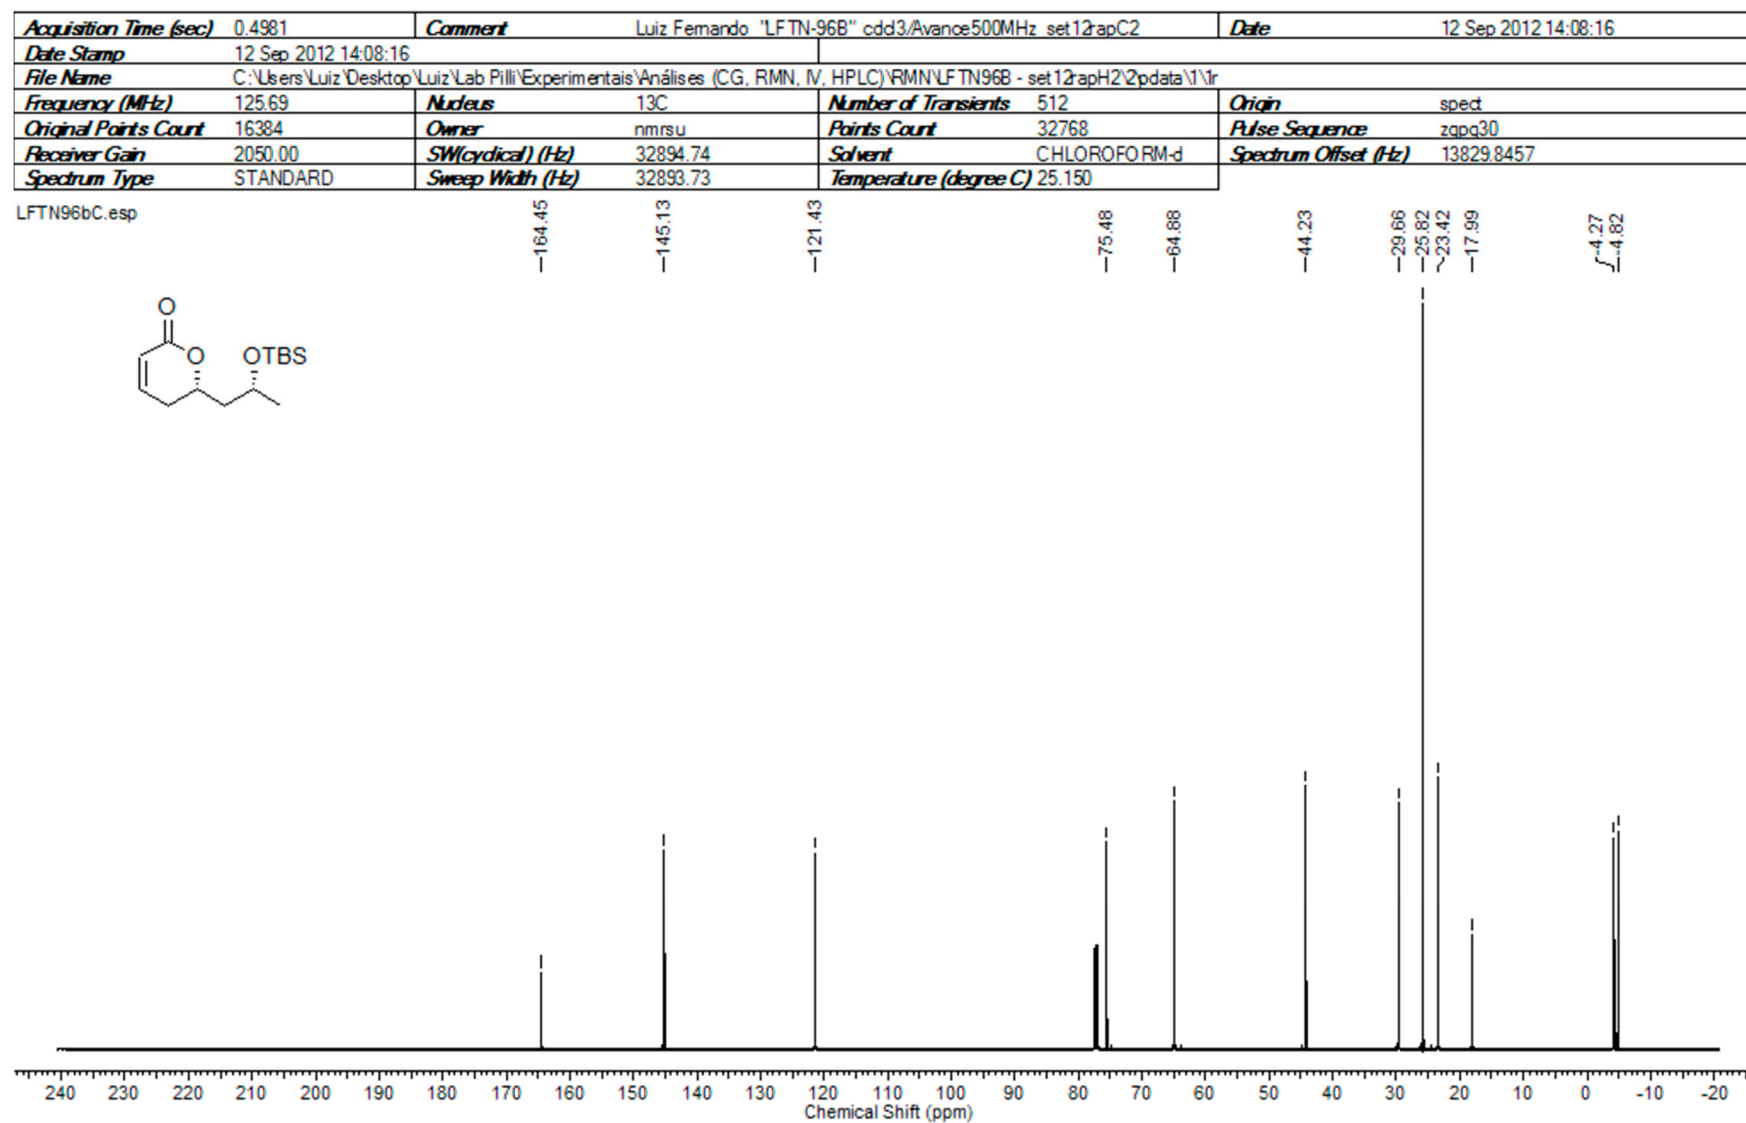

Figure S14. <sup>13</sup>C-NMR (125 MHz, CDCl<sub>3</sub>) of compound viii.

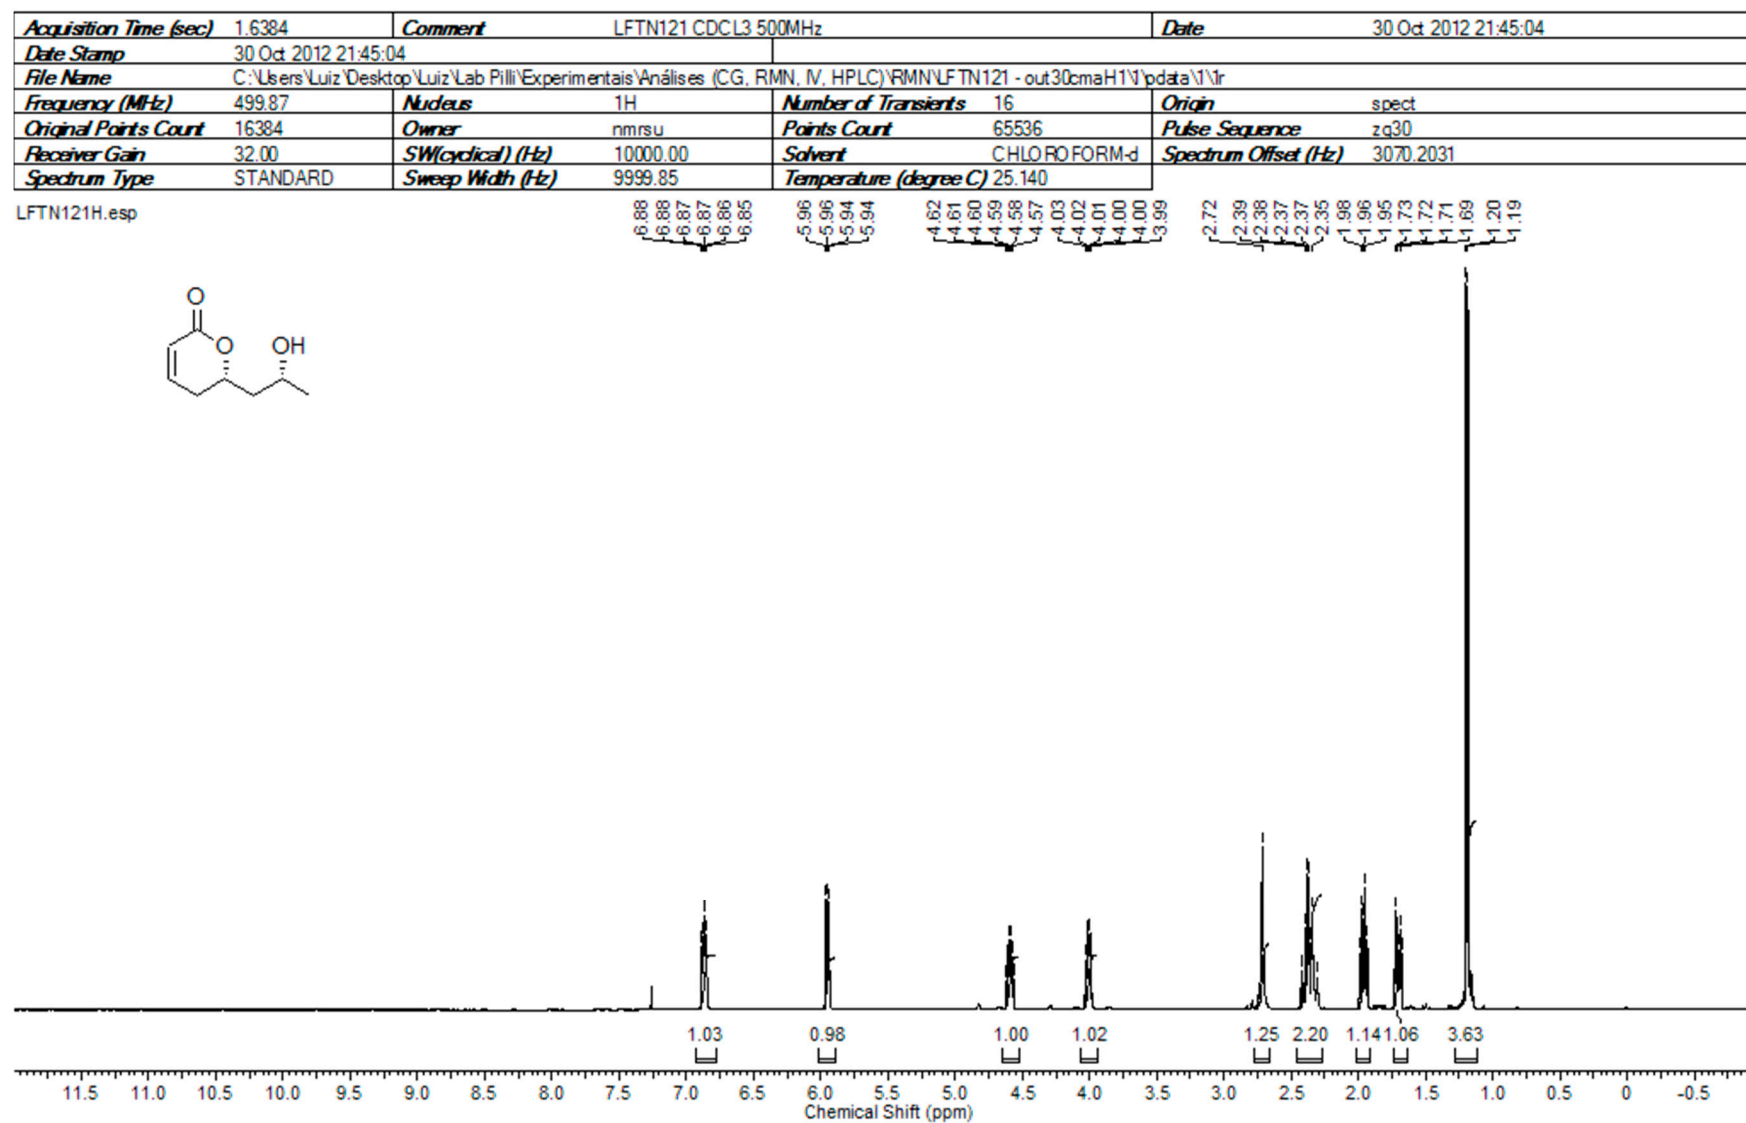Figure S15. <sup>1</sup>H-NMR (500 MHz, CDCl<sub>3</sub>) of compound 5.

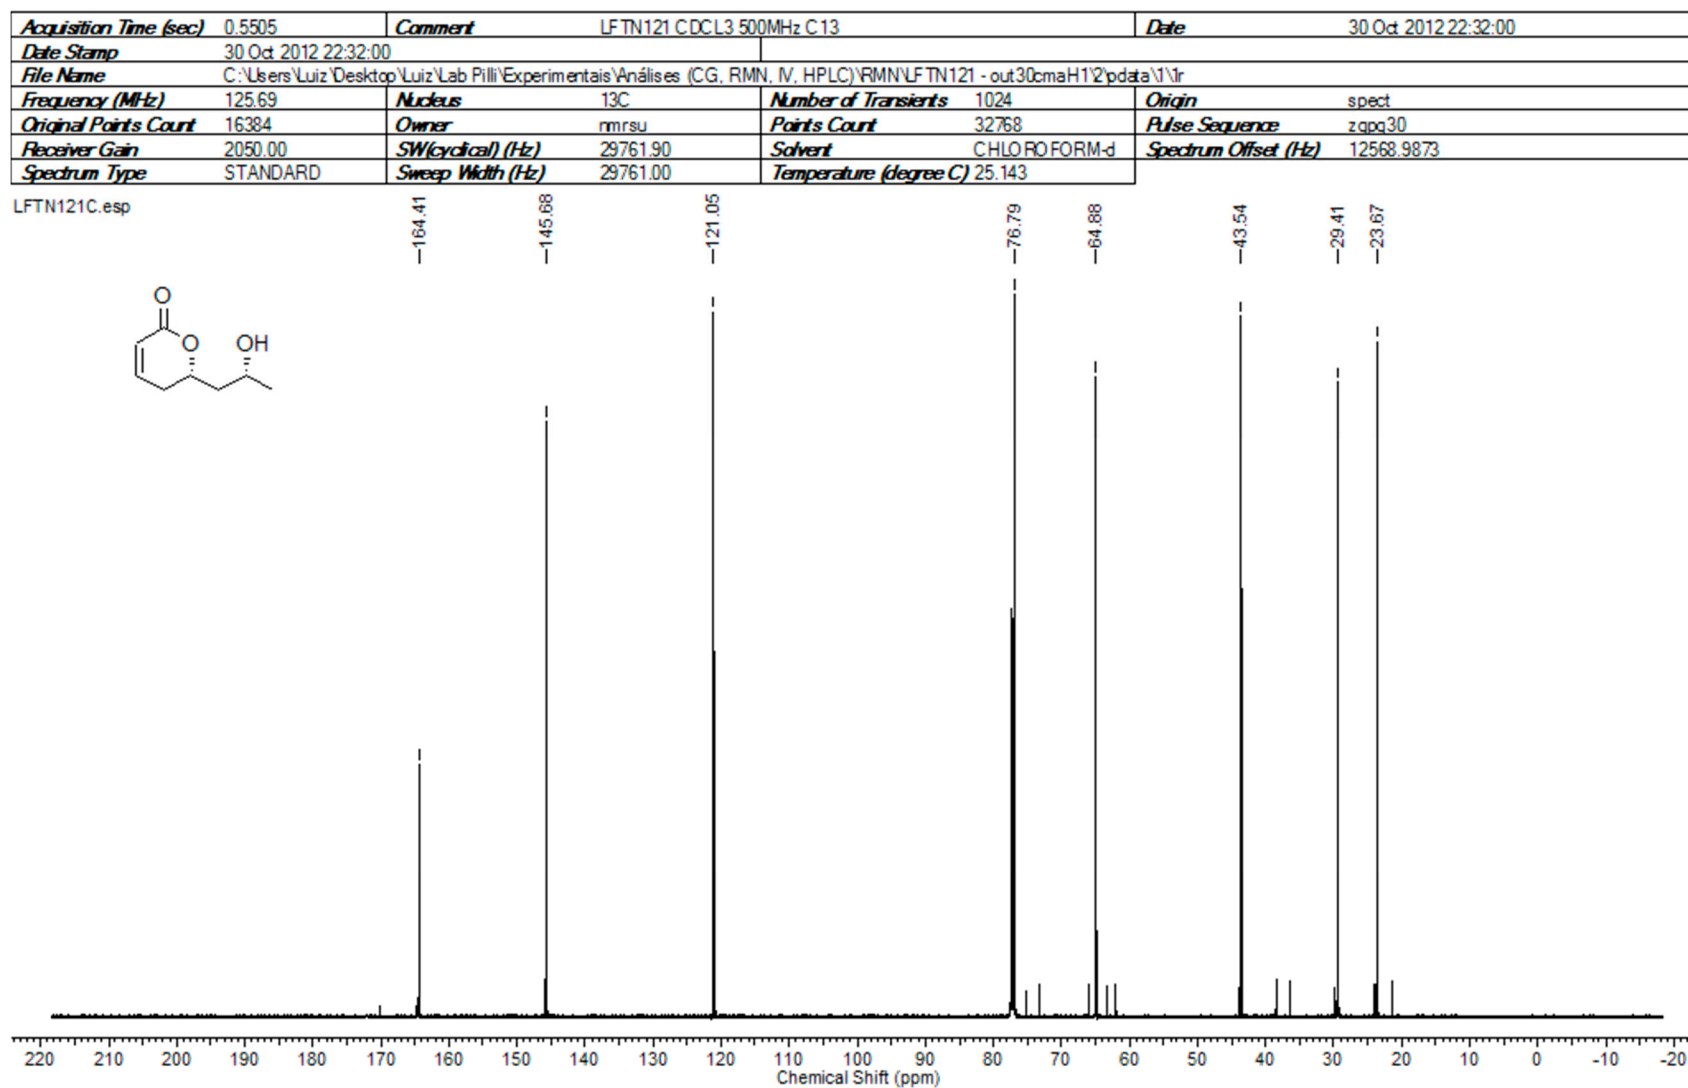

Figure S16. <sup>13</sup>C-NMR (125 MHz, CDCl<sub>3</sub>) of compound 5.

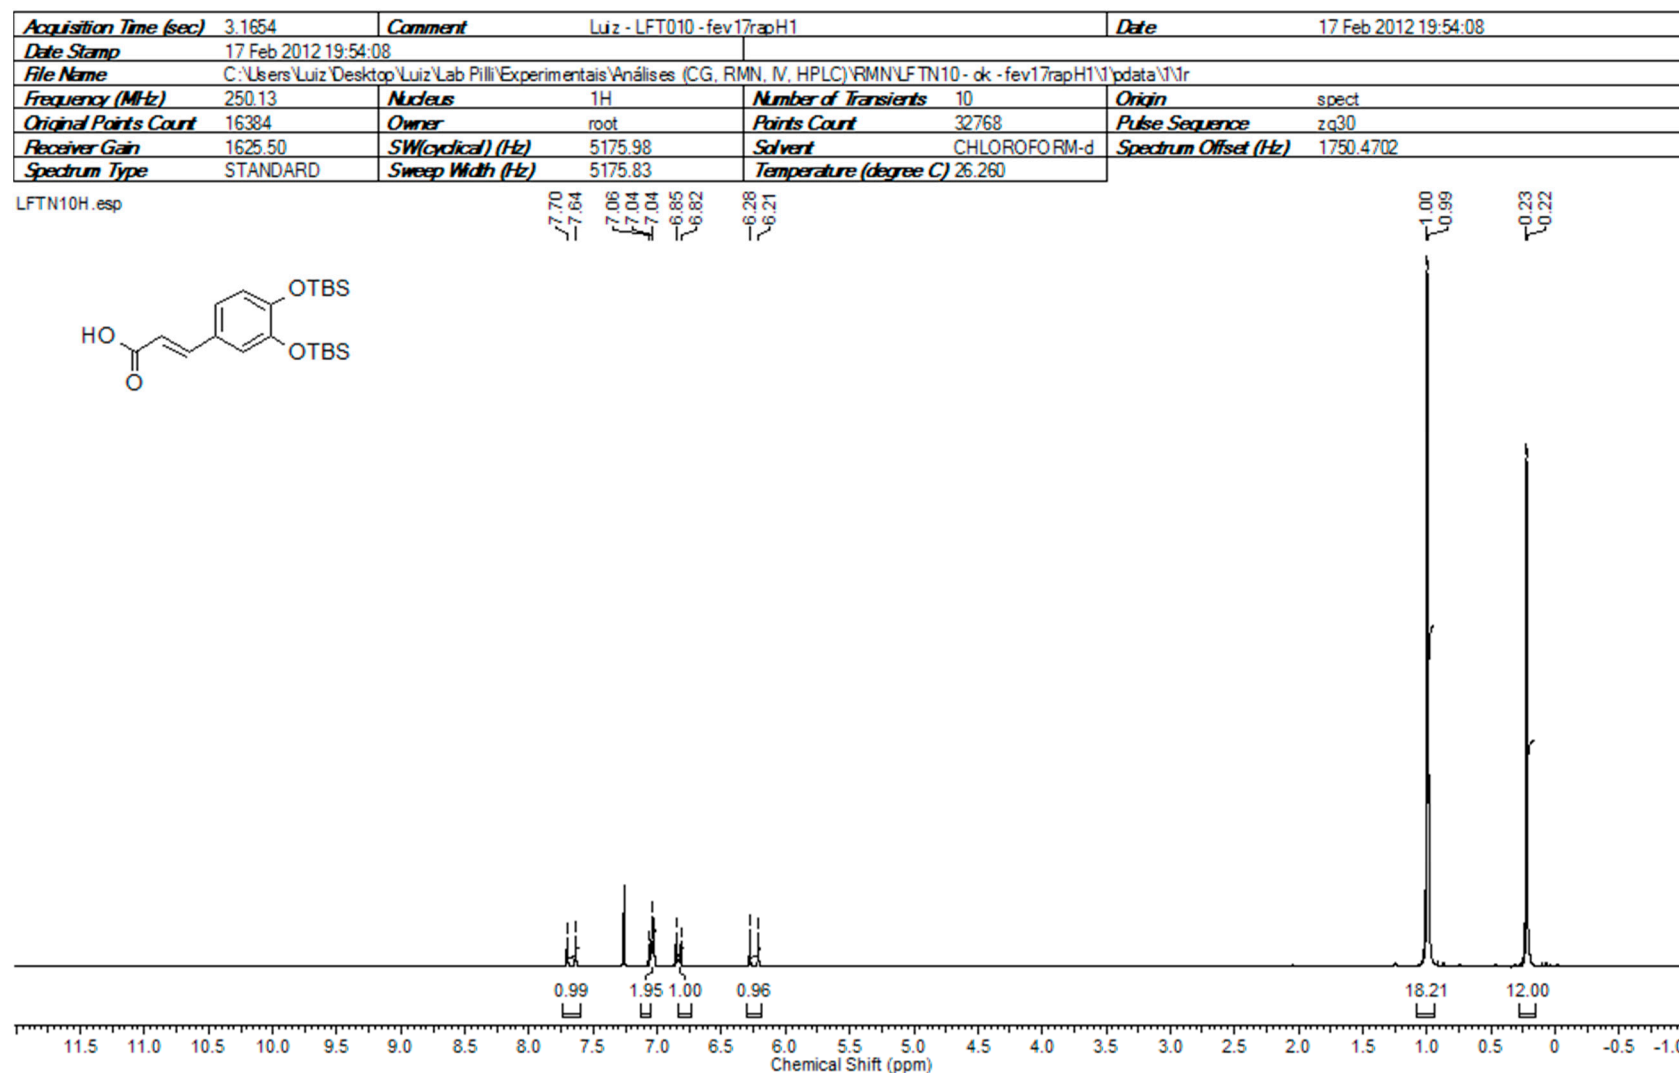

Figure S17.  $^1\text{H}$ -NMR (250 MHz,  $\text{CDCl}_3$ ) of compound ix.

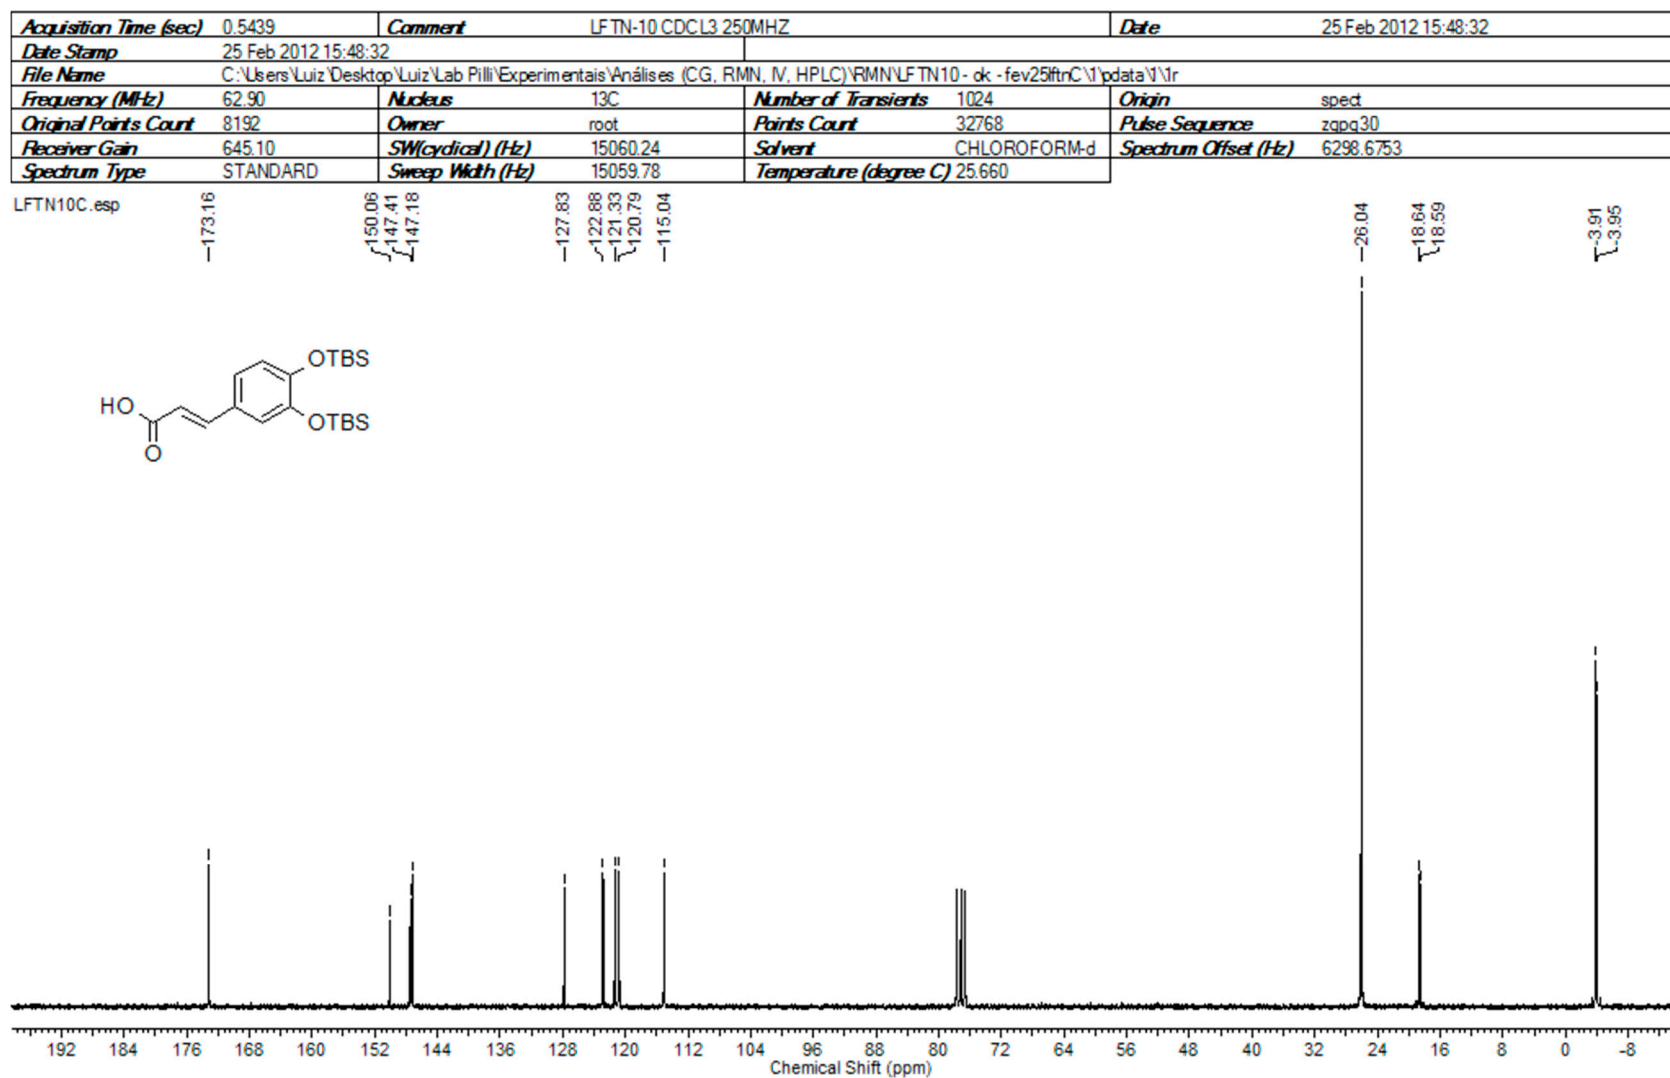

Figure S18. <sup>13</sup>C-NMR (62.9 MHz, CDCl<sub>3</sub>) of compound ix.

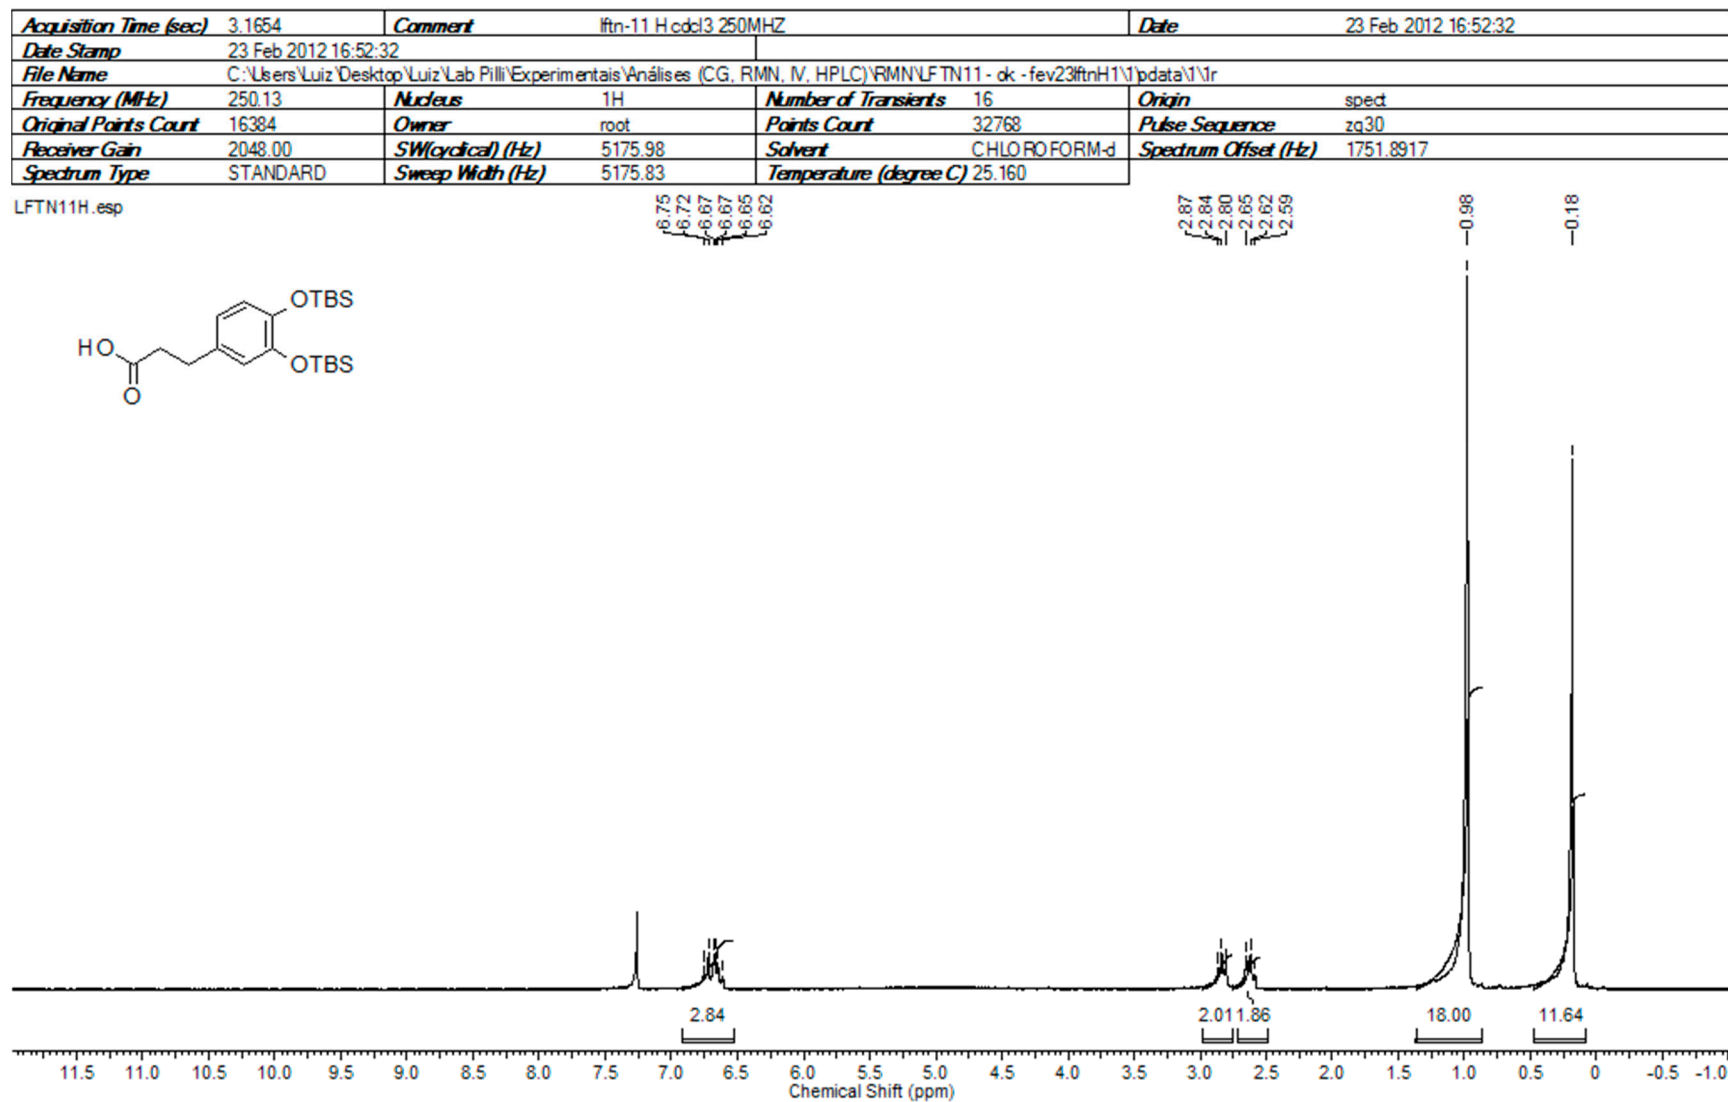

Figure S19. <sup>1</sup>H-NMR (250 MHz, CDCl<sub>3</sub>) of compound x.

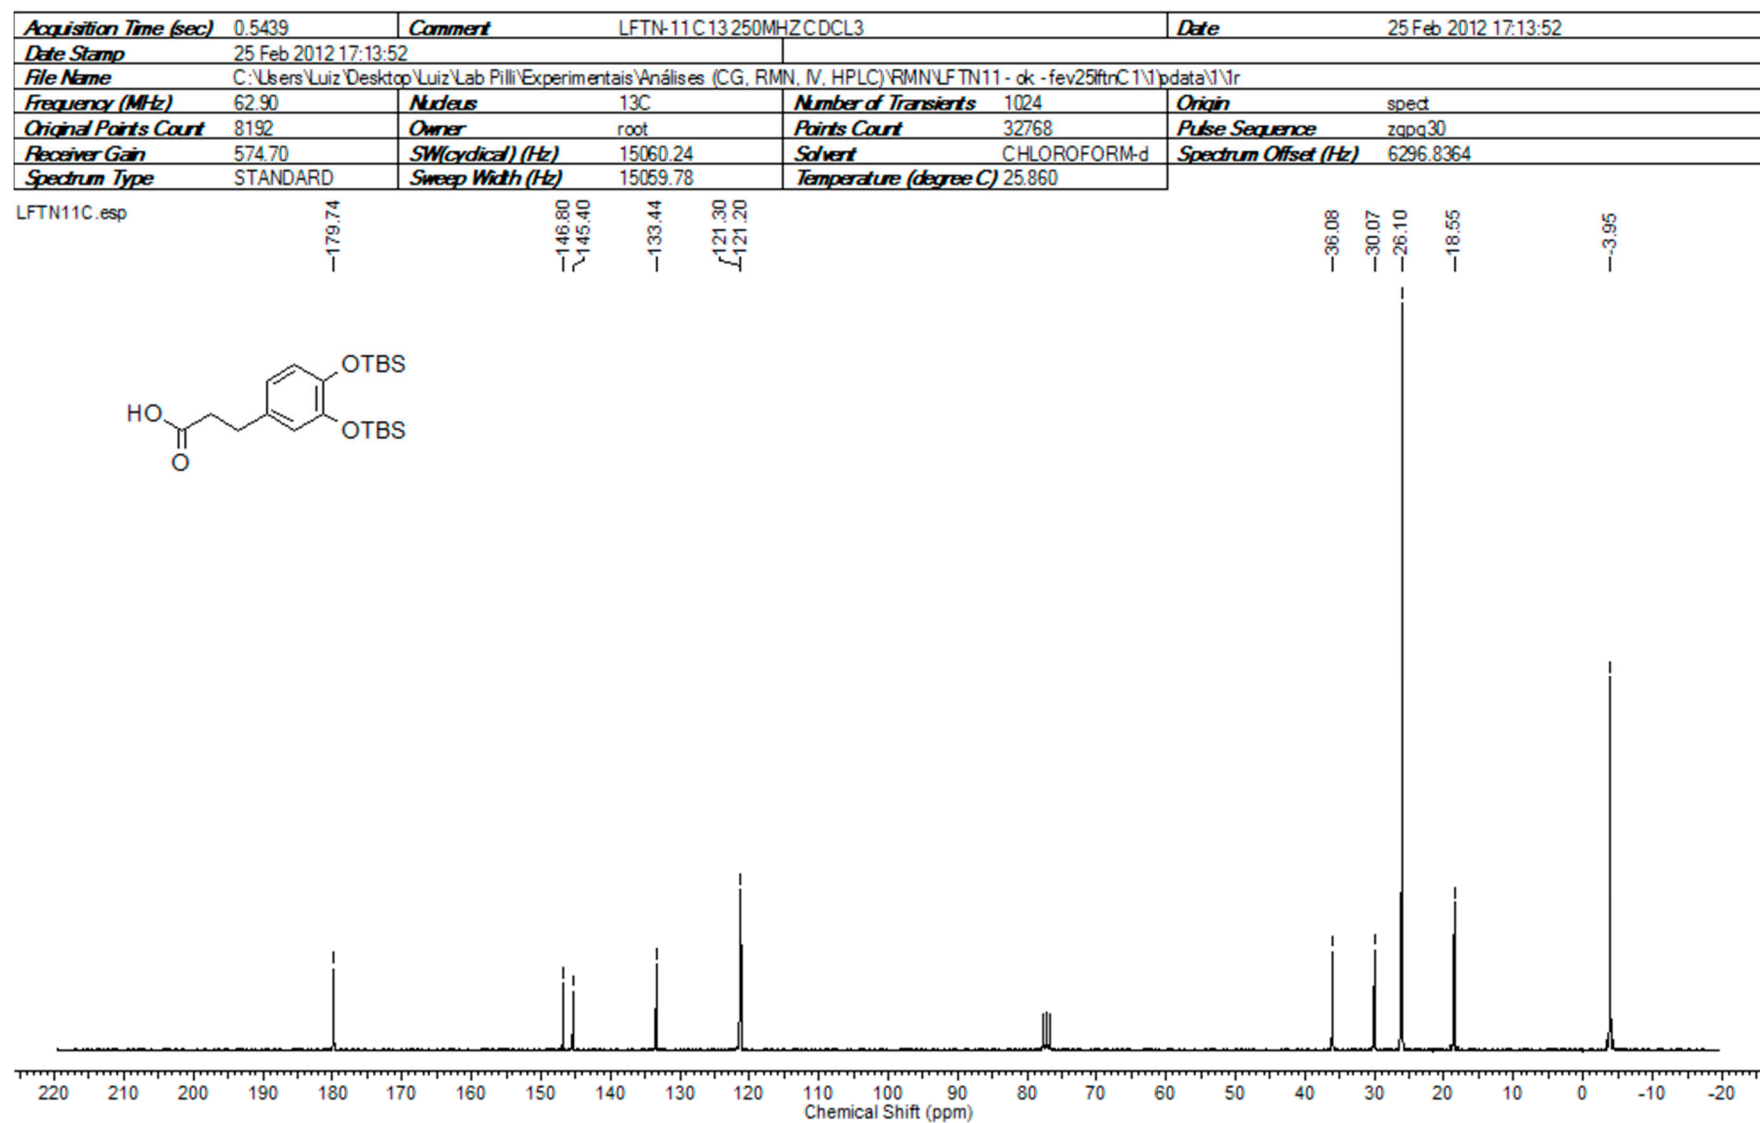

Figure S20. <sup>13</sup>C-NMR (62.9 MHz, CDCl<sub>3</sub>) of compound x.

LFTN122H.esp

CC[C@H]1CC[C@@H](C(=O)OCC2=CC=C(O)C=C2)OC(=O)C=C1

Chemical Shift (ppm)

6.83, 6.81, 6.74, 6.73, 6.71, 6.56, 6.54, 6.54, 5.99, 5.97, 5.05, 5.05, 5.05, 5.04, 5.03, 5.02, 4.22, 4.22, 4.21, 4.20, 4.19, 4.18, 4.17, 2.81, 2.80, 2.78, 2.60, 2.58, 2.57, 2.25, 2.18, 2.16, 2.06, 2.05, 2.04, 1.75, 1.73, 1.71, 1.23, 1.22

Chemical Shift (ppm)

6.85, 6.80, 6.75, 6.70, 6.65, 6.60, 6.55

Chemical Shift (ppm)

11.5, 11.0, 10.5, 10.0, 9.5, 9.0, 8.5, 8.0, 7.5, 7.0, 6.5, 6.0, 5.5, 5.0, 4.5, 4.0, 3.5, 3.0, 2.5, 2.0, 1.5, 1.0, 0.5, 0, -0.5, -1

1.10, 1.05, 0.93, 1.06, 1.12, 1.00, 0.98, 2.01, 2.01, 3.06, 1.05, 3.23

**Figure S21.**  $^1\text{H}$ -NMR (500 MHz,  $\text{CDCl}_3$ ) of compound **1**.

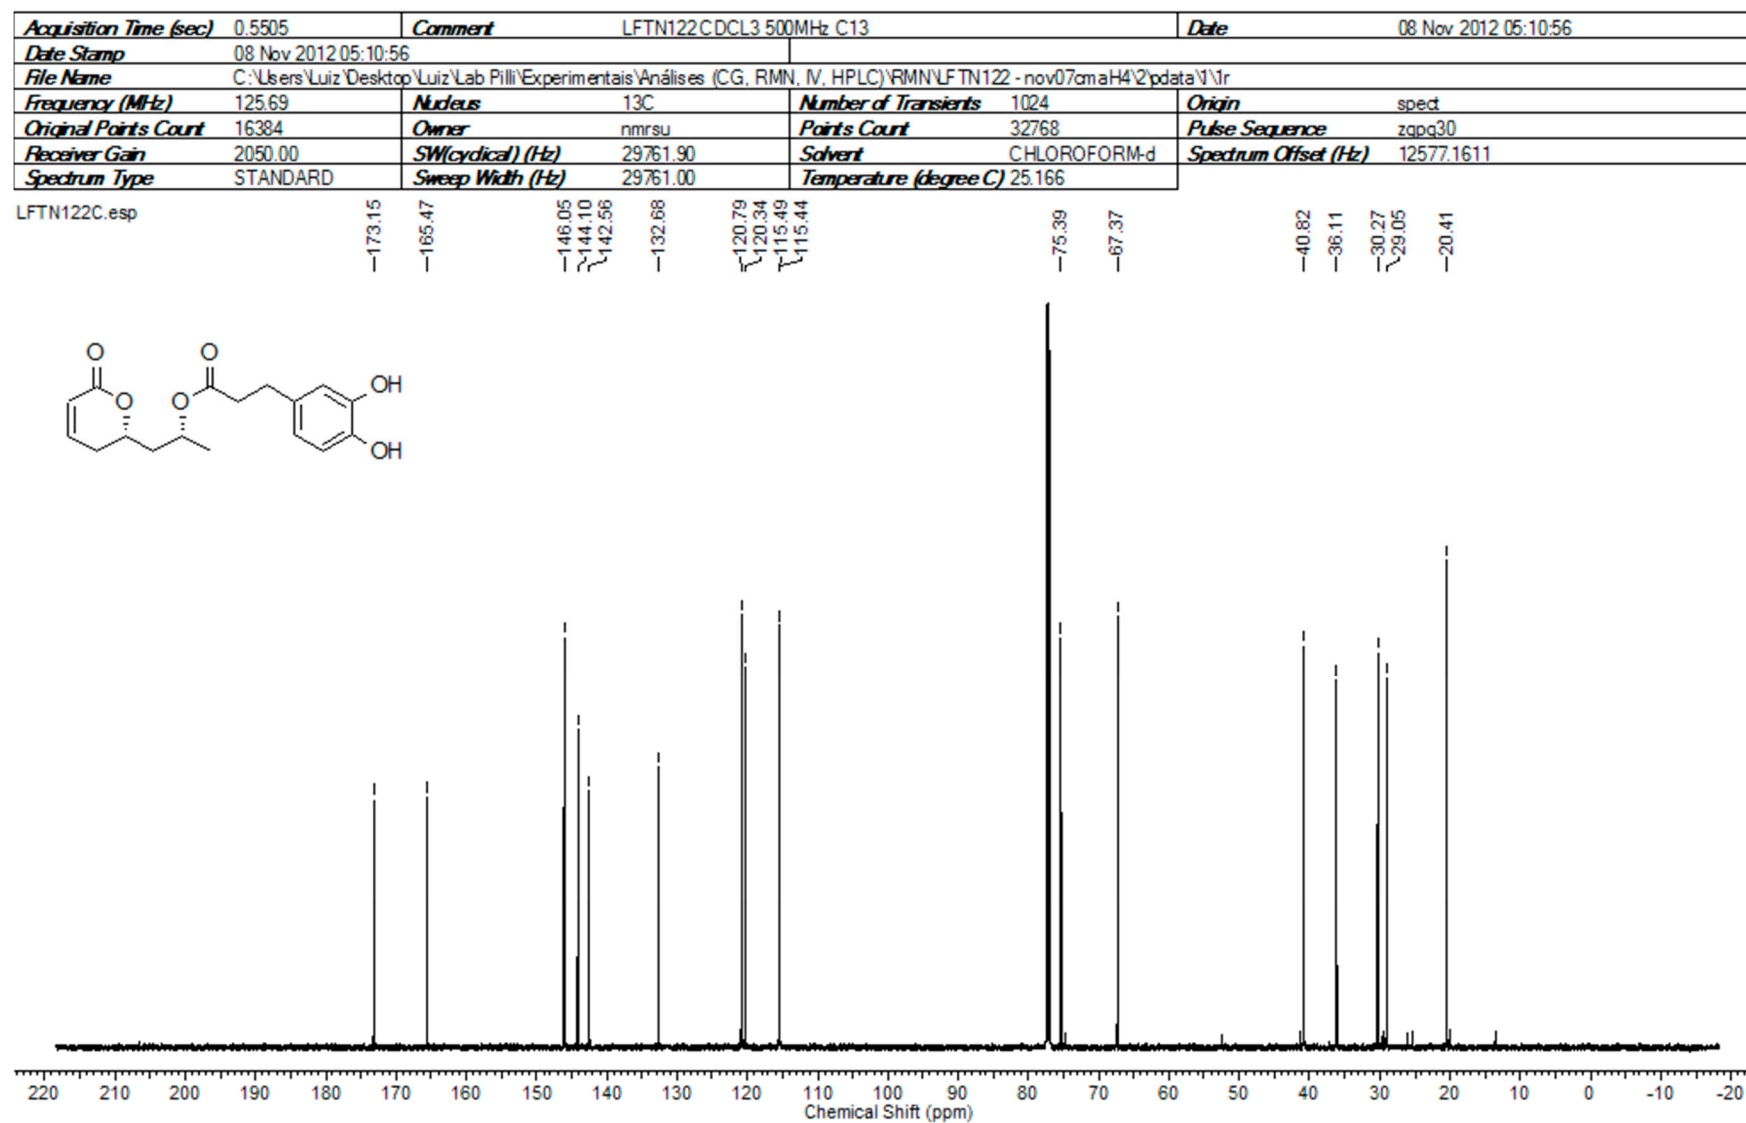

Figure S22. <sup>13</sup>C-NMR (125 MHz, CDCl<sub>3</sub>) of compound 1.

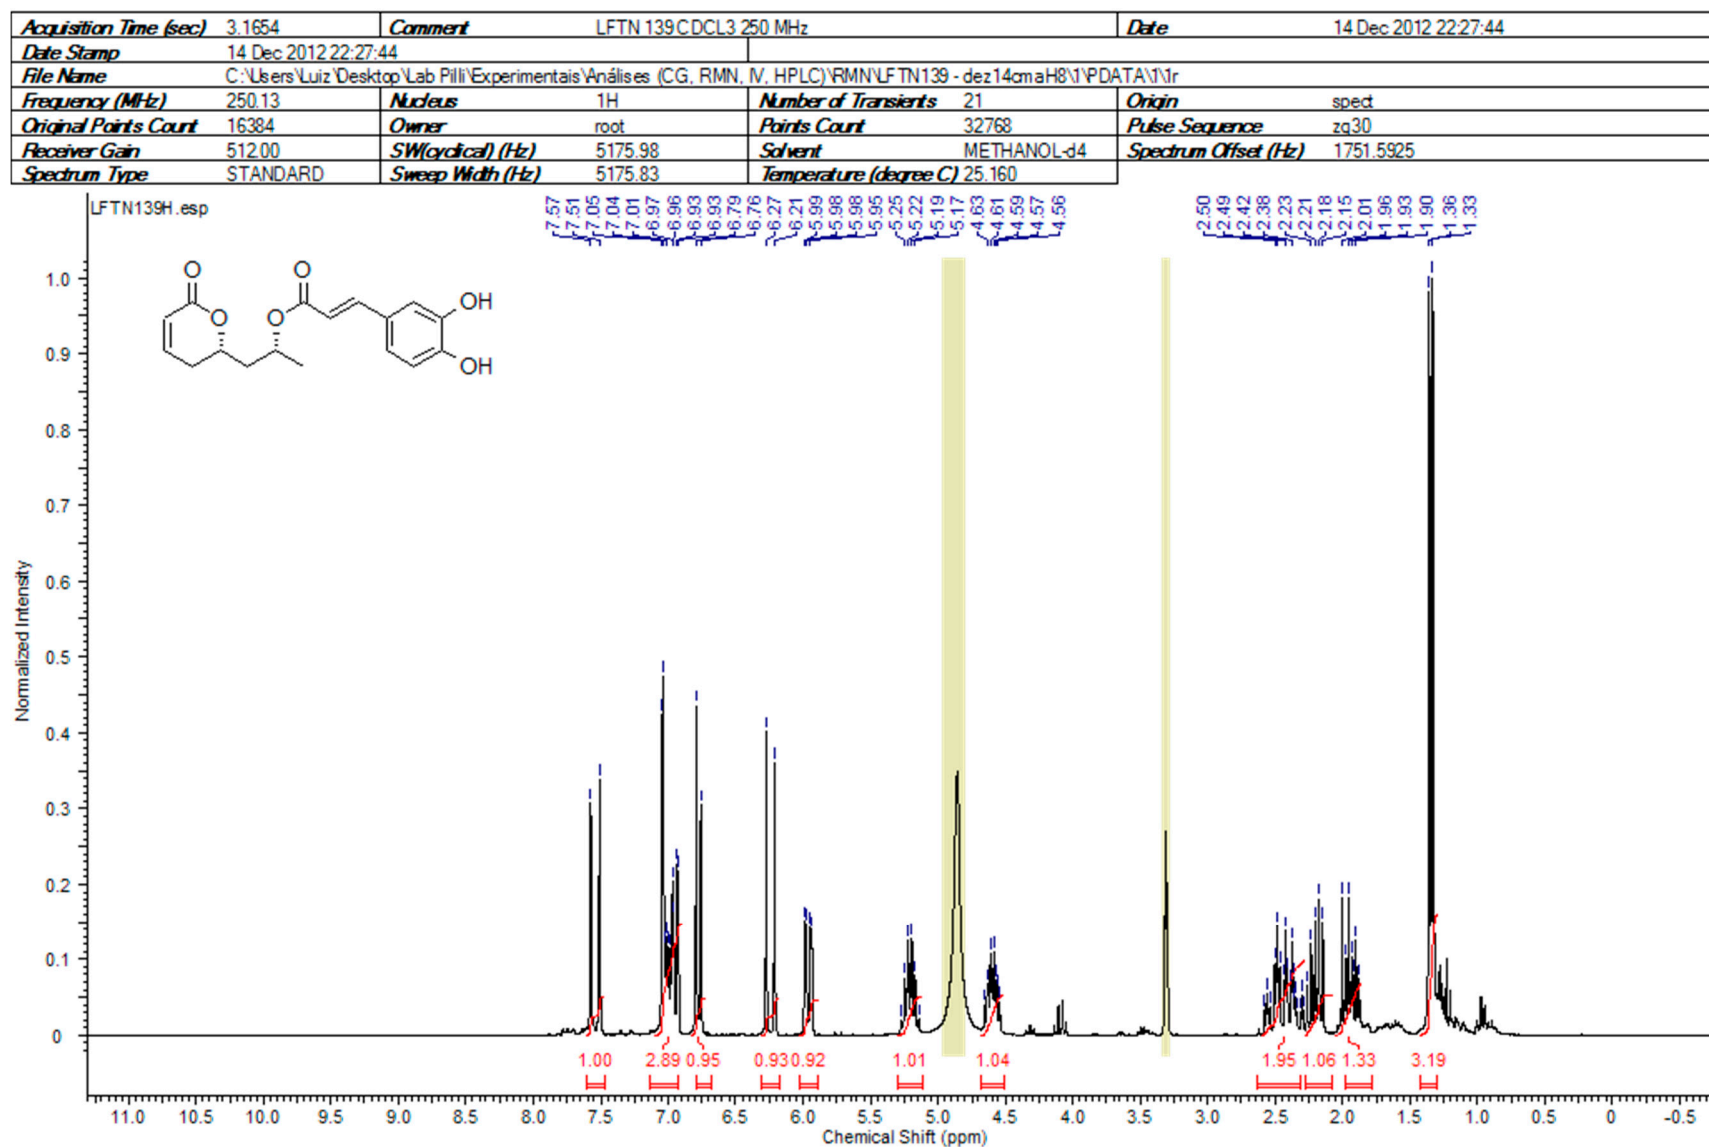

Figure S23.  $^1\text{H}$ -NMR (250 MHz, methanol-d<sub>4</sub>) of compound 4.

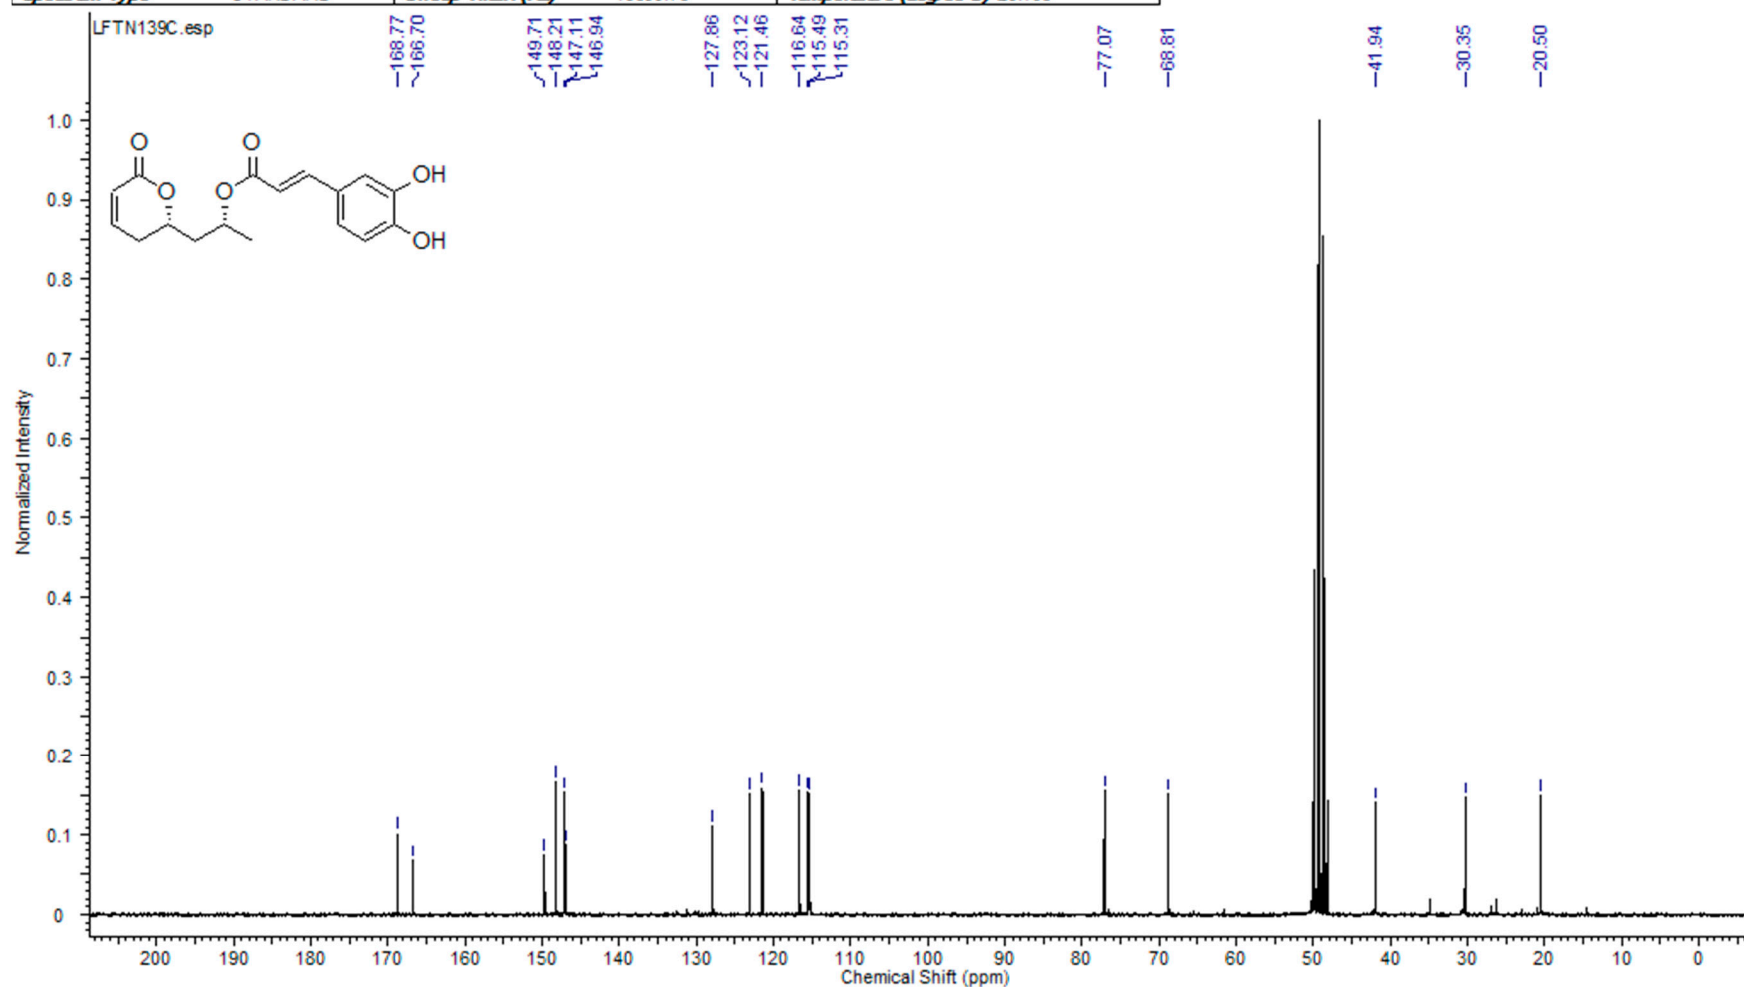

**Figure S24.**  $^{13}\text{C}$ -NMR (62.9 MHz, methanol- $\text{d}_4$ ) of compound **4**.
